# Supplementary material for: The Origins of Egyptian Civilization: From Cultural Evolution and Cosmic Alignments to Mythological Foundations
Source: Research Square preprint supplement (doi:10.21203/rs.3.rs-6294368/v1), 2025-04-17
Supplement: Supplementary file 2 [file 7d7e7f9401df94e3aa19a0d7.xlsx]

## Sheet: Sepultures
Data S1. Dataset for all individuals inside Eastern cemetery of Adaima, including period, localisation (x, y), biological data, and cultural data
Sepult	chronological_period	chronological phase	X	Y	sector	Sex	maturation	age	age class	0_1_year	1_5_years	5_10_years	10_15_years	15_19_years	up_to_19_years	10_12_years	up_to_12_years	inhumation type	wrap_type	burials	top	coffin_material	W_coffin	l_coffin	d_conffin	thickness_coffin	damage	Arrangement	body_position	body_orientation	face_orientation	right_arm_position	left_arm_position	right_hand_position	left_hand_position	hand_position	right_leg_position	left_leg_position	feet_position	nb_action	offering	nb_offering	offering position	head	upper_limb	thorax	back	front	near_jar
166	IIID/3e dyn	3edyn	32.5794834	25.23053653	N	?	0	12_15	12_15	0	0	0	1	0	0	0	1	Coffin	nothing	NA	?	mud	1.07	0.57	?	?	0	in situ	left	S	SW	bent	bent	left forearm	forearm	symmetry thorax	slightly bent	slightly bent	crossed	5	1	1	in sediment	0	0	0	0	0	0
476	IIID/3e dyn	3edyn	32.57952468	25.2307245	N	M	1	>19	>19	0	0	0	0	0	1	0	1	Simple pit	wrap in mat	NA	?	NA	NA	NA	NA	NA	0	hypercontraction	prone	S	ground	bent	bent	face	face	symmetry head	hyper-bent	hyper-bent	close	3	1	32	above the body and in the 3-storey infill	0	0	0	0	0	0
400	IIID/3e dyn	3edyn	32.57950223	25.23050041	N	?	0	9_11	5_10	0	0	1	0	0	0	0	0	Simple pit	basket	NA	?	NA	NA	NA	NA	NA	0	in situ	prone	S	ground	bent	bent	face	leg	asymmetry leg-head	hyper-bent	hyper-bent	separated	6	1	5	at the top of the skull	0	0	0	0	0	0
472	IIID/3e dyn	3edyn	32.5795167	25.23076445	N	?	0	10_19	11_19	0	0	0	1	0	0	0	1	Simple pit	wrap in mat	NA	?	NA	NA	NA	NA	NA	0	hypercontraction	prone	W	ground	bent	bent	face	face	symmetry head	hyper-bent	hyper-bent	joined	4	1	4	in front of face and inclined towards west	1	0	0	0	0	0
647	IIIA2	IIIe	32.57952689	25.23015371	S	?	0	12-18 m	1_5	0	1	0	0	0	0	0	0	Simple pit	wrap in mat	Simple pit Wrapped	?	NA	NA	NA	NA	NA	0	hypercontraction	prone	SE	ground	bent	slightly bent	shoulder	pelvis	asymmetry leg-thorax	bent	bent	separated	2	1	2	1 against the body 1 against the skull	1	0	1	0	0	0
864	IIID/3e dyn	3edyn	32.57946618	25.23071701	N	?	0	newborn-6 m	0-1	1	0	0	0	0	0	0	0	Simple pit	covered by a jar	NA	?	NA	NA	NA	NA	NA	4	NA	NA	S	NA	NA	NA	NA	NA	NA	NA	NA	NA	3	1	1	under body	0	0	0	0	0	0
881	?	NA	32.57951473	25.23081681	N	?	0	newborn	0-1	1	0	0	0	0	0	0	0	Jar	nothing	Jar	?	NA	NA	NA	NA	NA	0	in situ	right	SE	E	bent	bent	leg	leg	symmetry leg	slightly bent	slightly bent	joined	2	1	1	against jar	0	0	0	0	0	1
922	IIID/3e dyn	3edyn	32.57942956	25.23087195	N	?	0	18 m	1_5	0	1	0	0	0	0	0	0	Simple pit	nothing	Simple pit	?	NA	NA	NA	NA	NA	4	NA	belly	E	NA	NA	NA	NA	NA	NA	bent	bent	separated	2	1	1	west of the body	0	0	0	0	0	0
925	IIID/3e dyn	3edyn	32.5794144	25.23080625	N	M	1	>19	>19	0	0	0	0	0	1	0	1	Jar	covered by a frgmt of jar	Jar	?	NA	NA	NA	NA	NA	4	NA	seated	W	NA	bent	bent	left foot	face	asymmetry leg-head	bent	bent	close	3	1	2	1 under 1 on the body	0	0	0	0	0	0
895	IIIA2-IIID	IIIm	32.579499	25.23086986	N	M	1	20-25	>19	0	0	0	0	0	1	0	1	Simple pit	wrap in mat	NA	?	NA	NA	NA	NA	NA	0	hypercontraction	back	SE	W	bent	bent	thorax	thorax	symmetry thorax	hyper-bent	hyper-bent	joined	3	1	1	1 m above the body	0	0	0	0	0	0
494	IIID/3e dyn	3edyn	32.57944769	25.23073713	N	?	0	1_4	1_5	0	1	0	0	0	0	0	0	Jar	wrap in mat	Jar	?	NA	NA	NA	NA	NA	4	hypercontraction	left	E	?	NA	slightly bent	leg	ankle	symmetry leg	hyper-bent	hyper-bent	close	3	1	2	callus jar	0	0	0	0	0	0
479	IIID/3e dyn	3edyn	32.57947085	25.23073787	N	?	0	foetus	0-1	1	0	0	0	0	0	0	0	Jar	nothing	Jar	?	NA	NA	NA	NA	NA	5	NA	NA	?	?	NA	NA	NA	NA	NA	bent	NA	NA	2	1	1	against body	0	0	0	0	1	0
481	IIID/3e dyn	3edyn	32.57954541	25.2307147	N	?	0	newborn	0-1	1	0	0	0	0	0	0	0	Jar	nothing	Jar	?	NA	NA	NA	NA	NA	3	NA	NA	?	NA	NA	NA	NA	NA	NA	NA	NA	NA	NA	1	1	in jar	0	0	0	0	0	0
443	IIIA2-IIID	IIIm	32.5794215	25.23052242	N	?	0	0_1	0-1	1	0	0	0	0	0	0	0	Simple pit	wrap in mat	NA	?	NA	NA	NA	NA	NA	3	hypercontraction	belly	E	NE	bent	bent	chin	chin	symmetry head	hyper-bent	hyper-bent	separated	3	1	2	1 on foot 1 under pelvis	0	0	0	0	0	0
458	IIID/3e dyn	3edyn	32.57945374	25.23065286	N	?	0	0_1	0-1	1	0	0	0	0	0	0	0	Simple pit	wrap in mat	NA	?	NA	NA	NA	NA	NA	0	hypercontraction	seated	W	?	NA	slightly bent	NA	NA	NA	bent	bent	joined	4	1	1	in the neck	1	0	0	0	0	0
984	3e dyn	3edyn	32.57955279	25.2308613	N	?	0	3 m	0-1	1	0	0	0	0	0	0	0	Simple pit	covered by a jar	in pit under jar	?	NA	NA	NA	NA	NA	0	in situ	left	SW	ground	bent	bent	right hip	face	asymmetry leg-head	bent	bent	separated	3	1	1	1 on the body 1 against the skull 1 lower limb	1	0	0	0	0	0
894	IIID/3e dyn	3edyn	32.57947702	25.23085963	N	?	0	newborn	0-1	1	0	0	0	0	0	0	0	Simple pit	covered by a jar	in pit under jar	?	NA	NA	NA	NA	NA	0	hypercontraction	right	S	W	bent	bent	face	face	symmetry head	bent	bent	joined	3	1	1	above the body	0	0	0	0	0	0
847	IIID/3e dyn	3edyn	32.57947406	25.23065839	N	?	0	newborn	0-1	1	0	0	0	0	0	0	0	Simple pit	covered by a jar	in pit under jar	?	NA	NA	NA	NA	NA	0	NA	back	W	NA	bent	bent	face	head	symmetry head	hyper-bent	hyper-bent	separated	4	1	9	Above the body in the filling	0	0	0	0	0	0
493	IIID/3e dyn	3edyn	32.57947322	25.23067135	N	?	0	0_1	0-1	1	0	0	0	0	0	0	0	Jar	nothing	Jar	?	NA	NA	NA	NA	NA	0	in situ	belly	NW	ground	bent	bent	face	knee	asymmetry leg-head	hyper-bent	hyper-bent	NA	2	1	1	in front of sepulture	0	0	0	0	0	1
855	IIID/3e dyn	3edyn	32.57945586	25.23067801	N	?	0	newborn	0-1	1	0	0	0	0	0	0	0	Jar	nothing	Jar	?	NA	NA	NA	NA	NA	0	in situ	back	S	NE	bent	bent	NA	NA	NA	bent	bent	separated	3	1	1	jar opening	0	0	0	0	0	1
748	IIIA1-A2	IIIe	32.57956759	25.23032643	S	?	0	10 m	0-1	1	0	0	0	0	0	0	0	Jar	nothing	Jar	?	NA	NA	NA	NA	NA	0	in situ	right	SE	E	in extension	bent	knee	knee	symmetry leg	bent	bent	separated	3	1	5	in front of the jug	0	0	0	0	0	1
919	IIID/3e dyn	3edyn	32.57955262	25.23091037	N	?	0	newborn-3 m	0-1	1	0	0	0	0	0	0	0	Jar	nothing	Jar	?	NA	NA	NA	NA	NA	0	NA	NA	NA	NA	NA	NA	NA	NA	NA	NA	NA	NA	3	1	1	against jar	0	0	0	0	0	1
610	IID	IIt	32.57976908	25.22958607	S	?	0	2-3m	0-1	1	0	0	0	0	0	0	0	Jar	wrap in mat	Jar	?	NA	NA	NA	NA	NA	0	hypercontraction	right	SE	ground	bent	bent	face	face	symmetry head	bent	bent	separated	3	1	1	against base of jar	0	0	0	0	0	1
575	IIIA2	IIIe	32.57957021	25.22973718	S	?	0	newborn	0-1	1	0	0	0	0	0	0	0	Jar	nothing	Jar	?	NA	NA	NA	NA	NA	0	in situ	left	SE	W	bent	bent	abdomen	face	asymmetry head-thorax	slightly bent	in extension	separated	3	1	1	against wall	0	0	0	0	0	0
474	IIID/3e dyn	3edyn	32.5795282	25.23076389	N	?	0	0_1	0-1	1	0	0	0	0	0	0	0	Jar	nothing	Jar	?	NA	NA	NA	NA	NA	0	brought in jar	NA	W	ground	bent	bent	thorax	thorax	symmetry thorax	in extension	in extension	joined	3	1	2	against pot	0	0	0	0	0	1
766	IIIA2	IIIe	32.57963615	25.23018962	S	?	0	10 m	0-1	1	0	0	0	0	0	0	0	Jar	nothing	Jar	?	NA	NA	NA	NA	NA	0	in situ	left	SE	NW	bent	bent	right femur	face	asymmetry leg-head	bent	bent	separated	4	1	1	front face between forearms	1	0	0	0	0	0
500	IIIA2	IIIe	32.57949858	25.23008177	S	?	0	1_4	1_5	0	1	0	0	0	0	0	0	Simple pit	basket	Simple pit in Basket	0	NA	NA	NA	NA	NA	0	hypercontraction	belly	SE	ground	bent	bent	thorax	neck	asymmetry head-thorax	hyper-bent	hyper-bent	joined	5	1	4	1 on the head 1 on the shoulder 1 on the long left arm 1 covers the lower part of the body	1	1	1	0	0	0
501	IID-IIIA1	IIt	32.57946846	25.23004842	S	?	0	5_9	5_10	0	0	1	0	0	0	0	0	Simple pit	wrap in mat	NA	?	NA	NA	NA	NA	NA	0	in situ	left	SE	ground	bent	bent	thorax	leg	asymmetry leg-thorax	bent	bent	close	3	1	1	in filling	0	0	0	0	0	0
562	IIIA2	IIIe	32.57952636	25.22993533	S	?	0	5_6	5_10	0	0	1	0	0	0	0	0	Simple pit	basket	NA	0	NA	NA	NA	NA	NA	0	hypercontraction	left	S	ground	bent	bent	face	face	symmetry head	bent	bent	close	2	1	2	1 top of the head 1 in front of the legs	1	1	0	0	0	0
546	IIIA2	IIIe	32.57953833	25.22989183	S	?	0	2_3	1_5	0	1	0	0	0	0	0	0	Simple pit	nothing	Simple pit	?	NA	NA	NA	NA	NA	0	in situ	left	S	W	in extension	in extension	leg	leg	symmetry leg	bent	bent	joined	2	1	5	1 against the back 1 in front of the feet 3 in front of the subject	0	1	0	1	1	0
545	IIIA2	IIIe	32.57951539	25.22990696	S	?	0	5_6	5_10	0	0	1	0	0	0	0	0	Simple pit	nothing	NA	?	NA	NA	NA	NA	NA	0	hypercontraction	left	SE	ground	bent	bent	face	left leg	asymmetry leg-head	bent	bent	close	3	1	1	in filling	0	0	0	0	0	0
468	IIID/3e dyn	3edyn	32.57951209	25.23071752	N	?	0	1_4	1_5	0	1	0	0	0	0	0	0	Simple pit	wrap in mat	Simple pit Wrapped	?	NA	NA	NA	NA	NA	1	NA	left	E	S	bent	bent	face	face	symmetry head	NA	NA	NA	2	1	1	next to the right limb	0	0	0	0	0	0
469	IIID/3e dyn	3edyn	32.57950571	25.23072371	N	F	1	>19	>19	0	0	0	0	0	1	0	1	Simple pit	wrap in mat	NA	?	NA	NA	NA	NA	NA	0	in situ	right	S	N	bent	bent	left leg	Abdomen	asymmetry leg-thorax	hyper-bent	hyper-bent	close	3	1	16	on body	0	0	0	0	0	0
687	IIIA1	IIIe	32.57971398	25.22956756	S	?	0	3	1_5	0	1	0	0	0	0	0	0	Jar	nothing	Jar	?	NA	NA	NA	NA	NA	0	hypercontraction	left	SE	ground_NW	bent	bent	right hip	chin	asymmetry leg-head	hyper-bent	hyper-bent	close	3	1	1	against face	1	0	0	0	0	0
516	IIIA2	IIIe	32.57947501	25.23018379	S	?	0	1_4	1_5	0	1	0	0	0	0	0	0	Simple pit	wrap in mat	Simple pit Wrapped	?	NA	NA	NA	NA	NA	0	hypercontraction	left	SE	W	hyper-bent	hyper-bent	face	face	symmetry head	hyper-bent	hyper-bent	close	2	1	3	above the body	0	0	0	0	0	0
455	IIID/3e dyn	3edyn	32.57943519	25.23052941	N	?	0	1_4	1_5	0	1	0	0	0	0	0	0	Simple pit	wrap under jar	in pit under jar	?	NA	NA	NA	NA	NA	0	in situ	right	E	NW	bent	bent	face	face	symmetry head	bent	bent	close	3	1	1	on knees	0	1	0	0	0	0
637	IIIA2	IIIe	32.57955783	25.23003025	S	?	0	18-24 m	1_5	0	1	0	0	0	0	0	0	Jar	nothing	Jar	?	NA	NA	NA	NA	NA	0	in situ	seated	SW	ground	bent	bent	thorax	thorax	symmetry thorax	hyper-bent	hyper-bent	close	4	1	6	against jar	0	0	0	0	0	1
980	IIID/3e dyn	3edyn	32.57952051	25.23083167	N	?	1	>19	>19	0	0	0	0	0	1	0	1	Coffin	wrap in mat	NA	?	mud	1	0.5	0.3	0.03	0	hypercontraction	back	NW	E	bent	bent	Abdomen	face	asymmetry head-thorax	hyper-bent	hyper-bent	joined	4	1	1	outside chest	0	0	0	0	0	0
488	IIID/3e dyn	3edyn	32.57945472	25.2307552	N	F	1	>30	>19	0	0	0	0	0	1	0	1	Simple pit	nothing	NA	?	NA	NA	NA	NA	NA	0	hypercontraction	seated	SW	ground	bent	bent	thorax	left femur	asymmetry leg-thorax	hyper-bent	hyper-bent	close	2	1	2	1 top of the head 1 one layer on the back	1	0	0	1	0	0
994	IIID/3e dyn	3edyn	32.57954541	25.23086615	N	M	1	25-30	>19	0	0	0	0	0	1	0	1	Simple pit	wrap in mat	NA	?	NA	NA	NA	NA	NA	0	hypercontraction	left	N	ground	bent	bent	right leg	Abdomen	asymmetry leg-thorax	bent	bent	joined	3	1	2	10 cm from the legs	0	1	0	0	0	0
466_A	IIID/3e dyn	3edyn	32.57950086	25.23071248	N	F	1	>19	>19	0	0	0	0	0	1	0	1	Simple pit	nothing	NA	?	NA	NA	NA	NA	NA	0	in situ	seated	N	sky	NA	in extension	?	?	?	hyper-bent	hyper-bent	joined	4	1	21	in the filling	0	0	0	0	0	0
573	IIIA1	IIIe	32.57955498	25.22976754	S	?	0	3_4	1_5	0	1	0	0	0	0	0	0	Simple pit	nothing	Simple pit	?	NA	NA	NA	NA	NA	0	in situ	left	S	ground	bent	bent	chin	face	symmetry head	bent	bent	separated	2	1	1	against wall	0	0	0	0	0	0
473	IIID/3e dyn	3edyn	32.57951874	25.23075515	N	F	1	>19	>19	0	0	0	0	0	1	0	1	Coffin	wrap in mat	NA	?	mud	0.68	0.4	?	0.025-0.040	0	in situ	right	NW	SW	bent	bent	face	thorax	asymmetry head-thorax	hyper-bent	hyper-bent	joined	4	1	2	on trunk opening	0	0	0	0	0	0
506	IIIA2	IIIe	32.5795207	25.230092	S	?	0	1_4	1_5	0	1	0	0	0	0	0	0	Simple pit	wrap in mat	Simple pit Wrapped	?	NA	NA	NA	NA	NA	0	in situ	left	SE	ground	bent	hyper-bent	abdomen	face	asymmetry head-thorax	bent	bent	joined	2	1	1	against the skull	1	0	0	0	0	0
507	IID-IIIA1	IIt	32.57945497	25.23002311	S	?	0	1_4	1_5	0	1	0	0	0	0	0	0	Simple pit	wrap in mat	Simple pit Wrapped	?	NA	NA	NA	NA	NA	0	in situ	left	SE	ground	bent	bent	face	face	symmetry head	bent	bent	joined	2	1	1	in front of the face	1	0	0	0	0	0
510	IIIA2	IIIe	32.57949156	25.23009737	S	?	0	1_4	1_5	0	1	0	0	0	0	0	0	Coffin	wrap in mat	Coffin	?	wood	NA	NA	NA	NA	0	in situ	left	S	W	bent	in extension	leg	right knee	symmetry leg	bent	bent	joined	2	1	4	1 in front of the skull 1 under the pot 2 on the left knee,	1	0	0	0	0	0
485	IIID/3e dyn	3edyn	32.57944668	25.23071628	N	?	0	5_9	5_10	0	0	1	0	0	0	0	0	Simple pit	nothing	NA	?	NA	NA	NA	NA	NA	0	hypercontraction	back	N	NE	in extension	bent	left leg	neck	asymmetry leg-head	hyper-bent	hyper-bent	close	3	1	1	in the back	0	0	0	1	0	0
953	IIID/3e dyn	3edyn	32.57940076	25.23079458	N	?	0	2_3	1_5	0	1	0	0	0	0	0	0	Jar	nothing	Jar	?	NA	NA	NA	NA	NA	0	NA	belly	N	NE	bent	bent	thorax	thorax	symmetry thorax	hyper-bent	hyper-bent	joined	3	0	0	5 furniture to support the jar not a deposit	0	0	0	0	0	0
586	IIIA1	IIIe	32.57967315	25.22967994	S	?	0	6-12 m	0-1	1	0	0	0	0	0	0	0	Jar	nothing	Jar	?	NA	NA	NA	NA	NA	2	NA	NA	SE	?	NA	NA	NA	NA	NA	NA	NA	NA	3	1	1	against jar	0	0	0	0	0	1
959	3e dyn	3edyn	32.57956157	25.23088436	N	?	0	2.5	1_5	0	1	0	0	0	0	0	0	Jar	nothing	Jar	?	NA	NA	NA	NA	NA	0	NA	back	W	NA	slightly bent	slightly bent	NA	NA	NA	bent	bent	joined	3	1	3	in filling	0	0	0	0	0	0
605	IIIA1	IIIe	32.57957645	25.2297685	S	?	0	3_4	1_5	0	1	0	0	0	0	0	0	Simple pit	nothing	Simple pit	?	NA	NA	NA	NA	NA	2	in situ	left	S	S	bent	bent	Abdomen	Abdomen	symmetry thorax	bent	bent	close	3	1	5	3 against chest 2 above body	0	0	0	0	0	0
528	IIIA2	IIIe	32.57952276	25.22984931	S	?	0	1_5	1_5	0	1	0	0	0	0	0	0	Simple pit	wrap in mat	Simple pit Wrapped	?	NA	NA	NA	NA	NA	0	hypercontraction	left	SE	ground	bent	bent	face	face	symmetry head	hyper-bent	hyper-bent	close	3	1	2	1 on lower limbs 1 hands	0	1	1	0	0	0
770	IID-IIIA2	IIt	32.57961283	25.23022924	S	?	0	2.5	1_5	0	1	0	0	0	0	0	0	Simple pit	wrap ?	Simple pit Wrapped	?	NA	NA	NA	NA	NA	2	NA	left	SE	NA	bent	bent	face	head	symmetry head	bent	bent	close	2	1	1	under the hip	0	0	0	0	0	0
588	IIIA2	IIIe	32.57961155	25.22972719	S	?	0	4_5	1_5	0	1	0	0	0	0	0	0	Simple pit	nothing	Simple pit	?	NA	NA	NA	NA	NA	0	hypercontraction	right	S	NE	NA	NA	NA	NA	NA	bent	bent	joined	2	1	1	against skull	1	0	0	0	0	0
719	IIIA2	IIIe	32.57952726	25.23032116	S	?	0	6-9 m	0-1	1	0	0	0	0	0	0	0	Jar	nothing	Jar	?	NA	NA	NA	NA	NA	2	NA	back	NW	?	NA	slightly bent	abdomen	pelvis	symmetry thorax	hyper-bent	hyper-bent	separated	2	1	1	against bottom jar	0	0	0	0	0	0
673	IID	IIt	32.5796522	25.22962263	S	?	0	12-24 m	1_5	0	1	0	0	0	0	0	0	Simple pit	nothing	Simple pit	?	NA	NA	NA	NA	NA	2	NA	NA	?	?	?	?	?	?	?	?	?	?	3	1	2	1 against the forehead 1 at the feet	1	1	0	0	0	0
677	IID-IIIA1	IIt	32.57963156	25.22960549	S	?	0	1	0-1	1	0	0	0	0	0	0	0	Jar	nothing	Jar	?	NA	NA	NA	NA	NA	3	NA	left	W	ground_SE	bent	bent	NA	NA	NA	bent	bent	NA	4	1	2	1 counter jar 1 jar opening 1 jar base	0	0	0	0	0	0
587	IID-IIIA1	IIt	32.5796725	25.22970569	S	?	0	2	1_5	0	1	0	0	0	0	0	0	Jar	nothing	Jar	?	NA	NA	NA	NA	NA	2	NA	NA	E	?	NA	NA	NA	NA	NA	NA	NA	NA	3	1	1	against pit wall	0	0	0	0	0	0
617	IIIA2	IIIe	32.57943572	25.23000974	S	?	0	3_4	1_5	0	1	0	0	0	0	0	0	Simple pit	wrap in mat	Simple pit Wrapped	?	NA	NA	NA	NA	NA	3	NA	left	SE	ground	bent	bent	face	face	symmetry head	bent	bent	joined	2	1	1	in front of the face	1	0	0	0	0	0
751	IIIA2	IIIe	32.57959236	25.23028934	S	?	0	18-24 m	1_5	0	1	0	0	0	0	0	0	Simple pit	nothing	Simple pit	?	NA	NA	NA	NA	NA	2	NA	left	SE	NA	NA	NA	NA	NA	NA	bent	bent	joined	2	1	1	in front of the head	0	0	0	0	0	0
995	3e dyn	3edyn	32.57954644	25.23087233	N	F	1	>19	>19	0	0	0	0	0	1	0	1	Simple pit	nothing	NA	?	NA	NA	NA	NA	NA	0	hypercontraction	right	N	NA	bent	bent	head	head	symmetry head	hyper-bent	hyper-bent	joined	3	1	2	near head	1	0	0	0	0	0
477	IIID/3e dyn	3edyn	32.57946001	25.23065433	N	?	0	3	1_5	0	1	0	0	0	0	0	0	Coffin	nothing	Coffin	?	mud	0.45	0.4	?	0.015-0.02	1	NA	NA	S	?	NA	NA	NA	NA	NA	NA	NA	NA	3	1	2	on body	0	0	0	0	0	0
532	IIIA1	IIIe	32.57964136	25.22986541	S	?	0	2_3	1_5	0	1	0	0	0	0	0	0	Simple pit	nothing	Simple pit	?	NA	NA	NA	NA	NA	0	in situ	seated	N	ground_SE	bent	slightly bent	pelvis	pelvis	symmetry thorax	bent	bent	close	5	1	3	1 in bowl 1 on knees 1 against head 1 at subject's feet	1	0	0	0	0	0
915	3e dyn	3edyn	32.57946791	25.23088882	N	?	0	?	?	0	0	0	0	0	0	0	0	Simple pit	nothing	NA	?	NA	NA	NA	NA	NA	0	NA	NA	?	NA	NA	NA	NA	NA	NA	NA	NA	NA	3	1	4	empty	0	0	0	0	0	0
750	IID-IIIA2	IIt	32.57957138	25.23030448	S	F	1	50-60	>19	0	0	0	0	0	1	0	1	Simple pit	wrap in mat	NA	?	NA	NA	NA	NA	NA	0	hypercontraction	left	S	NW	bent	bent	face	face	symmetry head	bent	bent	close	5	1	1	in front of the head	1	0	0	0	0	0
514	IIIA2	IIIe	32.57952211	25.23007969	S	?	0	5_9	5_10	0	0	1	0	0	0	0	0	Coffin	wrap in mat	NA	?	wood	NA	NA	NA	NA	0	hypercontraction	belly	SE	ground	bent	bent	face	face	symmetry head	bent	bent	joined	2	1	2	2 in front of the head	0	0	0	0	0	0
850	IIID/3e dyn	3edyn	32.57947847	25.23068815	N	F	1	20-30	>19	0	0	0	0	0	1	0	1	Simple pit	wrap in mat	NA	?	NA	NA	NA	NA	NA	0	hypercontraction	left	W	ground	hyper-bent	hyper-bent	face	face	symmetry head	hyper-bent	hyper-bent	joined	3	1	1	on hip	0	1	0	0	0	0
397	IIID/3e dyn	3edyn	32.57947621	25.23049935	N	?	0	9_11	5_10	0	0	1	0	0	0	0	0	Simple pit	wrap in mat	NA	?	NA	NA	NA	NA	NA	0	hypercontraction	belly	E	NW	bent	bent	left shoulder	left shoulder	symmetry thorax	bent	bent	joined	3	1	5	1 in the sediment 1 under the skull	0	0	0	0	0	0
739	IIIA2	IIIe	32.57956075	25.23030671	S	?	0	4_5	1_5	0	1	0	0	0	0	0	0	Simple pit	wrap in mat	Simple pit Wrapped	?	NA	NA	NA	NA	NA	0	in situ	belly	SE	ground_SW	hyper-bent	bent	chin	face	symmetry head	bent	bent	separated	3	1	3	top of skull	1	0	0	0	0	0
533	IIIA2	IIIe	32.57955324	25.22990993	S	?	0	2.5	1_5	0	1	0	0	0	0	0	0	Simple pit	wrap in mat	Simple pit Wrapped	?	NA	NA	NA	NA	NA	0	in situ	left	S	W	bent	bent	face	face	symmetry head	slightly bent	slightly bent	joined	3	1	3	against skull	1	0	0	0	0	0
584	IIIA1	IIIe	32.57965089	25.22968883	S	?	0	2.5-3	1_5	0	1	0	0	0	0	0	0	Jar	wrap in mat	Jar	?	NA	NA	NA	NA	NA	0	brought in jar	left	NE	ground	bent	bent	thorax	thorax	symmetry thorax	bent	bent	NA	4	1	3	2 wedged 1 next to the jar	0	0	0	0	0	1
524	IIIA2	IIIe	32.5794414	25.23007726	S	?	0	3_5	1_5	0	1	0	0	0	0	0	0	Simple pit	wrap in mat	Simple pit Wrapped	?	NA	NA	NA	NA	NA	0	in situ	left	SE	ground_W	bent	bent	face	face	symmetry head	bent	bent	close	3	1	2	1 in front of the head 1 on the right femur	1	1	0	0	0	0
649	IIIA1-A2	IIIe	32.57950792	25.23012815	S	?	0	2.5-3	1_5	0	1	0	0	0	0	0	0	Simple pit	basket	Simple pit in Basket	?	NA	NA	NA	NA	NA	0	in situ	left	SE	ground	bent	bent	face	right forearm	asymmetry head-thorax	bent	bent	close	5	1	2	1 against pot 1 on forearm	0	0	1	0	0	1
907	IIIA2-IIID	IIIm	32.57940654	25.23052712	N	F	1	>30	>19	0	0	0	0	0	1	0	1	Coffin	wrap in mat	NA	1	mud	0.92	0.62	0.3	0.03	0	hypercontraction	left	S	NW	bent	bent	face	face	symmetry head	bent	bent	separated	5	1	1	against outside wall box	0	0	0	0	0	0
876	3e dyn	3edyn	32.57954565	25.23079308	N	F	1	>19	>19	0	0	0	0	0	1	0	1	Simple pit	wrap in mat	NA	?	NA	NA	NA	NA	NA	0	hypercontraction	right	NW	SW	bent	bent	right knee	leg	symmetry leg	hyper-bent	hyper-bent	joined	3	1	3	against face and 2 above the body in filling	1	0	0	0	0	0
998	3e dyn	3edyn	32.57952602	25.23089636	N	M	1	>30	>19	0	0	0	0	0	1	0	1	Simple pit	wrap in mat	NA	?	NA	NA	NA	NA	NA	0	hypercontraction	left	N	NE	hyper-bent	hyper-bent	face	face	symmetry head	hyper-bent	hyper-bent	joined	3	1	2	1 in the back 1 knees	0	1	0	1	0	0
974	IIIA1-A2	IIIe	32.5795471	25.23022084	S	?	0	18-24 m	1_5	0	1	0	0	0	0	0	0	Simple pit	wrap in mat	Simple pit Wrapped	?	NA	NA	NA	NA	NA	0	in situ	left	S	ground	bent	in extension	abdomen	right elbow	symmetry thorax	bent	bent	joined	3	1	1	on the head	1	0	0	0	0	0
916	IIID/3e dyn	3edyn	32.5794834	25.23089678	N	?	0	12-18 m	1_5	0	1	0	0	0	0	0	0	Simple pit	wrap in mat	Simple pit Wrapped	?	NA	NA	NA	NA	NA	0	hypercontraction	left	W	W	bent	in extension	thorax	knee	asymmetry leg-thorax	bent	bent	joined	2	1	2	on a block of stone	0	0	0	0	0	0
633	IIIA1	IIIe	32.57958525	25.22995659	S	?	0	12-16 m	1_5	0	1	0	0	0	0	0	0	Jar	wrap in mat	Jar	1	NA	NA	NA	NA	NA	0	hypercontraction	left	S	ground	bent	in extension	left knee	left leg	symmetry leg	bent	bent	close	4	1	1	against jar	0	0	0	0	0	1
666	IIIA1-A2	IIIe	32.57963266	25.22962972	S	?	0	3_4	1_5	0	1	0	0	0	0	0	0	Simple pit	wrap in mat	Simple pit Wrapped	?	NA	NA	NA	NA	NA	0	in situ	left	SE	ground	bent	bent	face	face	symmetry head	bent	bent	joined	3	1	2	1 against forearm 1 against skull	1	0	1	0	0	0
466_B	IIID/3e dyn	3edyn	32.57950086	25.23071248	N	M	1	>19	>19	0	0	0	0	0	1	0	1	Simple pit	wrap in mat	NA	?	NA	NA	NA	NA	NA	0	hypercontraction	back	S	ground	bent	bent	thorax	thorax	symmetry thorax	hyper-bent	hyper-bent	close	4	1	21	in the filling	0	0	0	0	0	0
874	IIID/3e dyn	3edyn	32.5795545	25.2307501	N	F	1	20-29	>19	0	0	0	0	0	1	0	1	Coffin	wrap in mat	NA	0	terracota	1	0.42	0.4	0.02-0.03	0	in situ	right	N	SW	slightly bent	bent	right knee	right elbow	asymmetry leg-thorax	bent	bent	joined	11	1	4	above the chest	0	0	0	0	0	0
971	IID-IIIA2	IIt	32.57965068	25.23018948	S	?	0	12-18 m	1_5	0	1	0	0	0	0	0	0	Simple pit	wrap in mat	Simple pit Wrapped	?	NA	NA	NA	NA	NA	0	in situ	left	S	SW	bent	bent	face	face	symmetry head	bent	bent	close	3	1	1	against the chest	0	0	1	0	0	0
656	IIIA1-A2	IIIe	32.57948965	25.22982363	S	?	0	18-24 m	1_5	0	1	0	0	0	0	0	0	Simple pit	wrap in mat	Simple pit Wrapped	?	NA	NA	NA	NA	NA	0	in situ	left	SE	ground	bent	bent	face	face	symmetry head	bent	bent	joined	2	1	2	1 in front of the face 1 under the forearm	1	0	1	0	0	0
760	IIIA1-A2	IIIe	32.57958578	25.23017332	S	?	0	18-24 m	1_5	0	1	0	0	0	0	0	0	Simple pit	wrap in mat	Simple pit Wrapped	?	NA	NA	NA	NA	NA	0	hypercontraction	belly	SE	ground	bent	bent	face	face	symmetry head	hyper-bent	hyper-bent	close	3	1	1	top of skull	1	0	0	0	0	0
650	IIIC	IIIm	32.57950629	25.23014696	S	?	0	7_8	5_10	0	0	1	0	0	0	0	0	Simple pit	wrap in mat	NA	?	NA	NA	NA	NA	NA	0	in situ	left	SE	ground_W	bent	bent	face	face	symmetry head	bent	bent	joined	3	1	4	1 in front of the face 1 on the back 1 under the vertebra 1 under the skull	1	0	1	0	0	0
552	IIIA2	IIIe	32.57950647	25.23001782	S	?	0	2-2.5	1_5	0	1	0	0	0	0	0	0	Simple pit	basket	Simple pit in Basket	0	NA	NA	NA	NA	NA	0	hypercontraction	left	SE	NW	in extension	in extension	knee	knee	symmetry leg	bent	bent	joined	4	1	4	1 at the foot 2 against the skull 1 in the filling	1	1	0	0	0	0
553	IIIA1-A2	IIIe	32.57949516	25.22999402	S	?	0	8_10	5_10	0	0	1	0	0	0	0	0	Simple pit	basket	NA	0	NA	NA	NA	NA	NA	0	hypercontraction	left	SE	W	bent	bent	face	face	symmetry head	hyper-bent	hyper-bent	joined	3	1	1	in front of the head	1	0	0	0	0	0
550	IIIA1	IIIe	32.57956259	25.22985098	S	?	0	2	1_5	0	1	0	0	0	0	0	0	Jar	wrap in mat	Jar	0	NA	NA	NA	NA	NA	0	hypercontraction	right	S	E	bent	bent	thorax	thorax	symmetry thorax	NA	NA	NA	3	1	2	1 on head 1 against bowl	1	0	0	0	0	0
609	IID	IIt	32.5797915	25.22958394	S	?	0	12-18 m	1_5	0	1	0	0	0	0	0	0	Jar	wrap in mat	Jar	?	NA	NA	NA	NA	NA	0	in situ	left	NE	ground_S	slightly bent	slightly bent	pelvis	knee	asymmetry leg-thorax	bent	bent	close	3	1	2	1 on the head 1 in front of the face	1	0	0	0	0	0
560	IIIA1-A2	IIIe	32.57954215	25.22995507	S	?	0	4	1_5	0	1	0	0	0	0	0	0	Simple pit	basket	Simple pit in Basket	0	NA	NA	NA	NA	NA	0	hypercontraction	left	SE	NW	bent	bent	face	face	symmetry head	bent	bent	joined	3	1	1	1 under the elbow 1 knee	0	0	1	0	0	0
478	IIID/3e dyn	3edyn	32.57947391	25.23067455	N	?	0	3_5	1_5	0	1	0	0	0	0	0	0	Simple pit	wrap under frgmt of jar	in pit under fragment of jar	?	NA	NA	NA	NA	NA	0	hypercontraction	left	SE	N	hyper-bent	hyper-bent	chin	chin	symmetry head	hyper-bent	bent	joined	4	1	1	around the body	0	0	0	0	1	0
644	IIIA1	IIIe	32.57953537	25.23020191	S	?	0	2.5-3	1_5	0	1	0	0	0	0	0	0	Simple pit	wrap under frgmt of jar	in pit under fragment of jar	?	NA	NA	NA	NA	NA	0	hypercontraction	left	SE	W	bent	bent	face	face	symmetry head	bent	bent	separated	3	1	1	against skull	1	0	0	0	0	0
631	IIIA1-A2	IIIe	32.57956919	25.22994412	S	?	0	4	1_5	0	1	0	0	0	0	0	0	Simple pit	covered by frgmt of offerings	in pit under fragment of jar	0	NA	NA	NA	NA	NA	0	NA	left	SE	W	bent	bent	face	face	symmetry head	bent	bent	joined	4	1	3	1 against jar 1 above subject	0	0	0	0	0	1
920	IIID/3e dyn	3edyn	32.57956639	25.23075144	N	?	0	3 +/- 12	1_5	0	1	0	0	0	0	0	0	Jar	nothing	Jar	?	NA	NA	NA	NA	NA	0	in situ	left	W	E	bent	bent	leg	knee	symmetry leg	bent	bent	crossed	5	1	3	2 inside jar 1 against jar	0	0	0	0	0	1
828	IID	IIt	32.57974454	25.22977256	S	?	0	18-24 m	1_5	0	1	0	0	0	0	0	0	Jar	wrap ?	Jar	?	NA	NA	NA	NA	NA	0	in situ	left	E	NW	bent	bent	abdomen	face	asymmetry head-thorax	bent	bent	close	3	1	3	against jar opening	0	0	0	0	0	1
765	IID-IIIA2	IIt	32.57961922	25.23019243	S	?	0	5_6	5_10	0	0	1	0	0	0	0	0	Simple pit	wrap ?	NA	?	NA	NA	NA	NA	NA	0	hypercontraction	left	S	ground	bent	bent	thorax	thorax	symmetry thorax	bent	bent	joined	2	1	2	top of the head	1	0	0	0	0	0
813	IIIA1	IIIe	32.57974072	25.22971483	S	?	0	2_3	1_5	0	1	0	0	0	0	0	0	Jar	nothing	Jar	?	NA	NA	NA	NA	NA	0	in situ	left	SW	E	bent	bent	right leg	left knee	symmetry leg	bent	bent	joined	4	1	4	against the jar	0	0	0	0	0	1
669	IIIA1	IIIe	32.57966441	25.22964613	S	?	0	12-18 m	1_5	0	1	0	0	0	0	0	0	Jar	wrap in mat	Jar	?	NA	NA	NA	NA	NA	0	in situ	left	W	NW	bent	bent	thorax	thorax	symmetry thorax	bent	bent	close	3	1	1	against jar	0	0	0	0	0	1
752	IIIA2	IIIe	32.57958592	25.23024552	S	?	0	2.5-3	1_5	0	1	0	0	0	0	0	0	Jar	wrap in mat	Jar	?	NA	NA	NA	NA	NA	0	in situ	left	SE	NW	bent	bent	head	head	symmetry head	bent	bent	separated	4	1	2	counter jar opening	0	0	0	0	0	1
705	IIIA1	IIIe	32.57975197	25.22968334	S	?	0	6-9 m	0-1	1	0	0	0	0	0	0	0	Jar	nothing	Jar	?	NA	NA	NA	NA	NA	0	in situ	belly	E	ground	bent	in extension	left shoulder	thorax	symmetry thorax	slightly bent	slightly bent	joined	3	1	1	on skull	1	0	0	0	0	0
692	IIIA2	IIIe	32.57965247	25.2301673	S	?	0	6 m	0-1	1	0	0	0	0	0	0	0	Simple pit	wrap in mat	NA	?	NA	NA	NA	NA	NA	0	in situ	left	E	SE	bent	bent	thorax	thorax	symmetry thorax	bent	bent	joined	3	1	1	20 cm from the body	0	0	0	0	1	0
702	IID-IIIA1	IIt	32.5797504	25.2296205	S	?	0	6-9 m	0-1	1	0	0	0	0	0	0	0	Jar	wrap in mat	Jar	?	NA	NA	NA	NA	NA	0	in situ	left	SE	SW	bent	bent	abdomen	Abdomen	symmetry thorax	bent	bent	close	3	1	1	against jar	0	0	0	0	0	1
657	IIIA1	IIIe	32.57948985	25.22984396	S	?	0	6	5_10	0	0	1	0	0	0	0	0	Simple pit	wrap in mat	NA	?	NA	NA	NA	NA	NA	0	hypercontraction	belly	S	ground	bent	bent	face	neck	symmetry head	hyper-bent	hyper-bent	joined	3	1	3	2 against skull 1 on shoulder	1	0	1	0	0	0
604	IIIA1	IIIe	32.57959247	25.22974143	S	?	0	24-30 m	1_5	0	1	0	0	0	0	0	0	Simple pit	wrap in mat	Simple pit Wrapped	?	NA	NA	NA	NA	NA	0	in situ	left	SE	SW	bent	bent	left forearm	chin	asymmetry head-thorax	bent	bent	separated	2	1	4	2 in front of the head 2 at the knees	1	1	0	0	0	0
541	IIIA1	IIIe	32.57945565	25.23011435	S	?	0	12-16 m	1_5	0	1	0	0	0	0	0	0	Jar	wrap in mat	Jar	?	NA	NA	NA	NA	NA	0	hypercontraction	belly	S	?	bent	slightly bent	thorax	pelvis	asymmetry leg-thorax	bent	bent	joined	3	1	1	wedge-shaped jar	0	0	0	0	0	1
761	IIIA1-A2	IIIe	32.57962186	25.23017239	S	?	0	12 m	1_5	0	1	0	0	0	0	0	0	Jar	nothing	Jar	?	NA	NA	NA	NA	NA	0	in situ	back	E	S	bent	bent	thorax	left knee	asymmetry leg-thorax	bent	bent	joined	4	1	1	against jar	0	0	0	0	0	1
654	IIIA1-A2	IIIe	32.57954254	25.23016656	S	?	0	6 m	0-1	1	0	0	0	0	0	0	0	Jar	wrap in mat	Jar	?	NA	NA	NA	NA	NA	0	in situ	back	S	NW	bent	bent	pelvis	thorax	asymmetry leg-thorax	bent	bent	joined	3	1	2	against jar	0	0	0	0	0	1
505	IIIA1-A2	IIIe	32.57953435	25.23003849	S	?	0	0_1	0-1	1	0	0	0	0	0	0	0	Jar	wrap in mat	Jar	?	NA	NA	NA	NA	NA	0	brought in jar	back	W	sky_S	bent	bent	abdomen	Abdomen	symmetry thorax	hyper-bent	hyper-bent	joined	4	1	1	against the jar	0	0	0	0	0	1
754	IIIA1-A2	IIIe	32.57959935	25.23023435	S	?	0	12-18 m	1_5	0	1	0	0	0	0	0	0	Simple pit	wrap in mat	Simple pit Wrapped	?	NA	NA	NA	NA	NA	0	in situ	left	SE	S	bent	bent	face	chin	symmetry head	bent	bent	close	3	1	1	in the back	0	0	0	1	0	0
551	IIIA1	IIIe	32.57958583	25.22985302	S	?	0	2.5	1_5	0	1	0	0	0	0	0	0	Simple pit	wrap in mat	Simple pit Wrapped	?	NA	NA	NA	NA	NA	0	hypercontraction	left	SE	W	bent	bent	face	face	symmetry head	bent	bent	joined	3	1	2	in front of the head	1	0	0	0	0	0
944	?	NA	32.57944029	25.23068791	N	F	1	>30	>19	0	0	0	0	0	1	0	1	Coffin	wrap in mat	NA	?	mud	0.88	0.45	0.16	0.035-0.05	0	hypercontraction	left	N	SE	bent	bent	face	leg	asymmetry leg-head	hyper-bent	hyper-bent	joined	3	1	1	under the lower limb	0	0	0	0	0	0
561	IIIA2	IIIe	32.57950494	25.22994113	S	?	0	12 m	0-1	1	0	0	0	0	0	0	0	Jar	nothing	Jar	?	NA	NA	NA	NA	NA	0	in situ	left	SE	W	in extension	in extension	pelvis	pelvis	symmetry thorax	bent	bent	close	3	1	3	1 on abdomen 1 on head 1 on left side	1	0	1	0	0	0
683	IID	IIt	32.57968239	25.22957995	S	?	0	9-12 m	0-1	1	0	0	0	0	0	0	0	Simple pit	basket	NA	?	NA	NA	NA	NA	NA	0	NA	right	SE	NE	bent	bent	left knee	right elbow	asymmetry leg-thorax	bent	bent	close	4	1	8	6 against the sides of the pit around the lower part of the body 2 behind the skull	1	0	0	0	0	0
558	IIIA2	IIIe	32.57949174	25.22996554	S	?	0	4_5	1_5	0	1	0	0	0	0	0	0	Simple pit	wrap in mat	Simple pit Wrapped	?	NA	NA	NA	NA	NA	0	hypercontraction	left	SE	ground_SW	bent	bent	face	head	symmetry head	bent	bent	joined	2	1	2	1 at the feet 1 in front of the face	1	1	0	0	0	0
570	IIIA1	IIIe	32.57955165	25.22979633	S	?	0	4_6	1_5	0	1	0	0	0	0	0	0	Simple pit	basket	Simple pit in Basket	0	NA	NA	NA	NA	NA	0	hypercontraction	left	SE	N	bent	bent	face	face	symmetry head	bent	bent	close	2	1	3	1 against pit wall 2 behind basin	0	1	0	0	0	0
153	IIID/3e dyn	3edyn	32.57944732	25.23064209	N	?	0	4_5	1_5	0	1	0	0	0	0	0	0	Jar	nothing	Jar	0	NA	NA	NA	NA	NA	0	hypercontraction	right	?	NE	bent	bent	face	face	symmetry head	bent	bent	close	3	1	1	on mat	0	0	0	0	0	0
543	IIIA2	IIIe	32.57943129	25.23009858	S	?	0	5_7	5_10	0	0	1	0	0	0	0	0	Simple pit	basket	NA	0	NA	NA	NA	NA	NA	0	hypercontraction	left	SE	SW	bent	bent	face	face	symmetry head	bent	bent	joined	3	1	9	1 against pit wall 4 in front of body 1 against arm 3 on forearm 1 indeterminate	0	0	1	0	0	0
559	IIIA2	IIIe	32.579517	25.22996263	S	?	0	3_5	1_5	0	1	0	0	0	0	0	0	Simple pit	basket	Simple pit in Basket	0	NA	NA	NA	NA	NA	0	hypercontraction	belly	SE	ground	bent	in extension	thorax	face	symmetry thorax	bent	bent	joined	3	1	7	4 head level 1 in front of legs 1 under shoulder 1 along the body	1	1	1	0	1	0
515	IID-IIIA2	IIt	32.57945477	25.23017657	S	?	0	5_9	5_10	0	0	1	0	0	0	0	0	Simple pit	wrap in mat	NA	?	NA	NA	NA	NA	NA	0	in situ	left	S	NW	bent	bent	face	head	symmetry head	bent	bent	joined	5	1	3	1 behind the head 2 top of the head	1	0	0	0	0	0
498	IIIA2	IIIe	32.57943655	25.23003589	S	?	0	1_4	1_5	0	1	0	0	0	0	0	0	Simple pit	wrap in mat	Simple pit Wrapped	?	NA	NA	NA	NA	NA	0	hypercontraction	left	SE	ground	bent	bent	face	face	symmetry head	hyper-bent	hyper-bent	joined	2	1	1	1 near top of head 1 on left hand	1	0	0	0	0	0
824	IID-IIIA2	IIt	32.57960179	25.2301334	S	?	0	8	5_10	0	0	1	0	0	0	0	0	Simple pit	basket	NA	?	NA	NA	NA	NA	NA	0	hypercontraction	left	S	W	bent	in extension	left elbow	left leg	asymmetry leg-thorax	bent	bent	separated	2	1	1	1 chin support 1 shoulder	1	0	0	0	0	0
810	IIIA1	IIIe	32.57971032	25.22973929	S	?	0	4	1_5	0	1	0	0	0	0	0	0	Simple pit	wrap in mat	Simple pit Wrapped	?	NA	NA	NA	NA	NA	0	in situ	left	SE	SW	bent	bent	face	face	symmetry head	bent	bent	joined	3	1	7	5 against the pit 1 on the hands 1 against the skull	1	0	1	0	0	0
671	IID	IIt	32.57969966	25.22966157	S	?	0	12-18 m	1_5	0	1	0	0	0	0	0	0	Simple pit	basket	Simple pit in Basket	0	NA	NA	NA	NA	NA	0	hypercontraction	left	S	N	in extension	bent	knee	knee	symmetry leg	bent	bent	joined	3	1	2	1 in front of skull 1 in back	1	0	0	1	0	0
674	IID	IIt	32.57968049	25.22962969	S	?	0	3_4	1_5	0	1	0	0	0	0	0	0	Simple pit	wrap in mat	Simple pit Wrapped	?	NA	NA	NA	NA	NA	0	in situ	left	E	S	bent	in extension	thorax	left knee	asymmetry leg-thorax	bent	bent	joined	3	1	4	1 against forehead 2 in front of head 1 in front of chest	1	0	1	0	0	0
161	IIID/3e dyn	3edyn	32.57949406	25.23059276	N	F	1	>19	>19	0	0	0	0	0	1	0	1	Coffin	wrap in mat	NA	?	mud	NA	NA	NA	NA	0	in situ	left	S	SW	bent	bent	face	face	symmetry head	bent	bent	close	5	1	9	1 in sediment 1 against body	0	0	0	0	0	0
164	IIID/3e dyn	3edyn	32.57945156	25.23059224	N	F	1	>19	>19	0	0	0	0	0	1	0	1	Coffin	wrap in mat	NA	0	mud	0.82	0.6	?	?	0	hypercontraction	left	S	W	bent	bent	head	head	symmetry head	hyper-bent	hyper-bent	close	3	1	1	2 cm from the wall	0	0	0	0	0	0
529	IIIC2-D	IIIt	32.57957217	25.2298731	S	?	0	8-12 m	0-1	1	0	0	0	0	0	0	0	Simple pit	wrap in mat	NA	?	NA	NA	NA	NA	NA	0	in situ	left	S	W	in extension	in extension	knee	knee	symmetry leg	bent	bent	close	3	1	2	2 on the subject's back	0	0	0	1	0	0
681	IID-IIIA1	IIt	32.5797214	25.2295984	S	?	0	12-18 m	1_5	0	1	0	0	0	0	0	0	Simple pit	wrap in mat	Simple pit Wrapped	?	NA	NA	NA	NA	NA	0	in situ	left	SE	W	bent	bent	left elbow	right knee	asymmetry leg-thorax	bent	bent	separated	4	1	3	2 in filling at feet level 1 in front of forehead	1	1	0	0	0	0
597	IIIA1	IIIe	32.57960213	25.22980178	S	?	0	1.5-2.5	1_5	0	1	0	0	0	0	0	0	Simple pit	wrap in mat	Simple pit Wrapped	?	NA	NA	NA	NA	NA	0	hypercontraction	left	SE	ground	bent	bent	face	face	symmetry head	bent	bent	separated	3	1	4	2 in front of the head 1 in front of the chest 1 in front of the feet	1	1	1	0	0	0
823	IID-IIIA2	IIt	32.57959372	25.23011512	S	?	0	5_6	5_10	0	0	1	0	0	0	0	0	Simple pit	basket	NA	?	NA	NA	NA	NA	NA	0	hypercontraction	left	SE	SW	bent	in extension	right femur	left knee	symmetry leg	bent	bent	joined	3	1	1	against forearm	0	0	1	0	0	0
679	IID	IIt	32.57970167	25.22961725	S	?	0	18 m	1_5	0	1	0	0	0	0	0	0	Jar	nothing	Jar	?	NA	NA	NA	NA	NA	0	in situ	left	W	ground	bent	bent	knee	knee	symmetry leg	bent	bent	joined	5	1	1	against jar	0	0	0	0	0	1
830	IIIA1	IIIe	32.57972667	25.22979713	S	?	0	1_4	1_5	0	1	0	0	0	0	0	0	Jar	nothing	Jar	?	NA	NA	NA	NA	NA	0	in situ	belly	W	ground	bent	bent	face	leg	asymmetry leg-head	hyper-bent	hyper-bent	joined	5	1	2	against jar	0	0	0	0	0	1
593	IID-IIIA1	IIt	32.57966702	25.22977242	S	?	0	2_3	1_5	0	1	0	0	0	0	0	0	Simple pit	wrap in mat	Simple pit Wrapped	?	NA	NA	NA	NA	NA	0	hypercontraction	left	SE	?	bent	bent	right knee	face	asymmetry leg-head	bent	bent	joined	2	1	1	1 against the top of the skull	1	0	0	0	0	0
725	IID-IIIA2	IIt	32.57949002	25.23028803	S	?	0	2.5-3	1_5	0	1	0	0	0	0	0	0	Simple pit	basket	Simple pit in Basket	0	NA	NA	NA	NA	NA	0	hypercontraction	left	SE	ground	bent	in extension	left arm	leg	asymmetry leg-thorax	bent	bent	joined	3	1	2	in front of forearm	0	0	1	0	0	0
837	IIID/3e dyn	3edyn	32.57941943	25.23061351	N	F	1	35-40	>19	0	0	0	0	0	1	0	1	Coffin	wrap in mat	NA	1	mud	0.82	0.53	NA	NA	0	hypercontraction	left	S	W	bent	bent	neck	neck	symmetry head	bent	bent	close	6	1	1	in front of the face	0	0	0	0	0	0
595	IIIA1-A2	IIIe	32.57958281	25.22974807	S	?	0	6_8	5_10	0	0	1	0	0	0	0	0	Simple pit	wrap in mat	NA	?	NA	NA	NA	NA	NA	0	hypercontraction	left	SE	ground	bent	bent	face	face	symmetry head	bent	bent	joined	2	1	1	in front of the head	1	0	0	0	0	0
538	IIIA2	IIt	32.57944365	25.23013179	S	?	0	7_8	5_10	0	0	1	0	0	0	0	0	Simple pit	wrap in mat	NA	?	NA	NA	NA	NA	NA	0	in situ	back	S	NE	bent	bent	thorax	thorax	symmetry thorax	bent	bent	NA	2	1	1	in front of the head	1	0	0	0	0	0
621	IIIA2	IIIe	32.57938585	25.23012595	S	?	0	3_4	1_5	0	1	0	0	0	0	0	0	Simple pit	basket	Simple pit in Basket	?	NA	NA	NA	NA	NA	0	NA	left	S	NW	bent	bent	face	face	symmetry head	bent	bent	crossed	2	1	3	1 in front of the chest 2 in front of the head	1	0	1	0	0	0
480	IIID/3e dyn	3edyn	32.57945389	25.23073027	N	?	0	3	1_5	0	1	0	0	0	0	0	0	Simple pit	wrap in mat	Simple pit Wrapped	?	NA	NA	NA	NA	NA	1	hypercontraction	back	E	N	bent	bent	head	head	symmetry head	hyper-bent	hyper-bent	separated	3	1	7	1 along left side of body 1 along side of face	0	0	0	0	0	0
530	IID-IIIA2	IIt	32.57949219	25.23019164	S	?	0	2_3	1_5	0	1	0	0	0	0	0	0	Simple pit	wrap in mat	Simple pit Wrapped	?	NA	NA	NA	NA	NA	2	in situ	left	S	W	bent	bent	face	face	symmetry head	bent	bent	joined	2	1	1	1 on forearm 1 in front of face	0	0	0	0	0	0
800	IIIA2	IIIe	32.57960679	25.22999873	S	?	0	3_4	1_5	0	1	0	0	0	0	0	0	Simple pit	covered by frgmt of offerings	in pit under fragment of jar	?	NA	NA	NA	NA	NA	0	in situ	left	SW	NW	bent	bent	left shoulder	face	asymmetry head-thorax	bent	bent	separated	6	1	3	2 against skull 1 on lower limb	1	1	0	0	0	0
634	IIIA1-A2	IIIe	32.57955478	25.22997297	S	?	0	7	5_10	0	0	1	0	0	0	0	0	Simple pit	covered by frgmt of offerings	NA	?	NA	NA	NA	NA	NA	0	NA	left	SE	ground	bent	bent	face	face	symmetry head	slightly bent	slightly bent	joined	3	1	3	2 above body against jar	0	0	0	0	0	1
886	3e dyn	3edyn	32.57946053	25.23082862	N	?	0	9_10	5_10	0	0	1	0	0	0	0	0	Simple pit	covered by frgmt of offerings	NA	?	NA	NA	NA	NA	NA	0	hypercontraction	right	N	E	bent	bent	right elbow	right arm	symmetry thorax	hyper-bent	hyper-bent	joined	3	1	3	1 in front of skull 1 above body 1 against wall	1	0	0	0	0	0
603	IIIA2	IIIe	32.57959343	25.22973421	S	?	0	2.5-4	1_5	0	1	0	0	0	0	0	0	Simple pit	covered by frgmt of offerings	in pit under fragment of jar	?	NA	NA	NA	NA	NA	0	hypercontraction	left	S	SW	bent	NA	NA	NA	NA	hyper-bent	hyper-bent	joined	2	1	2	on skull	1	0	0	0	0	0
869	IIID/3e dyn	3edyn	32.57942164	25.23079046	N	M	1	>30	>19	0	0	0	0	0	1	0	1	Simple pit	covered by frgmt of offerings	NA	?	NA	NA	NA	NA	NA	0	hypercontraction	left	W	N	bent	bent	thorax	face	asymmetry head-thorax	hyper-bent	hyper-bent	crossed	4	1	1	on head	1	0	0	0	0	0
906	IIID/3e dyn	3edyn	32.57942407	25.23053541	N	?	0	newborn	0-1	1	0	0	0	0	0	0	0	Coffin	nothing	NA	?	mud	NA	NA	NA	NA	0	in situ	back	SE	SW	bent	bent	face	face	symmetry head	bent	bent	joined	6	1	1	in the back	0	0	0	0	0	0
527	IIIA1	IIIe	32.57953634	25.22986583	S	?	0	6 m	0-1	1	0	0	0	0	0	0	0	Jar	wrap in mat	Jar	0	NA	NA	NA	NA	NA	0	hypercontraction	left	SE	W	in extension	in extension	right hip	knee	symmetry leg	bent	bent	joined	2	1	2	1 in front of the face 1 on lower limbs	1	1	0	0	0	0
484	IIID/3e dyn	3edyn	32.57946913	25.23076477	N	?	0	0_1	0-1	1	0	0	0	0	0	0	0	Jar	nothing	Jar	?	NA	NA	NA	NA	NA	5	brought in jar	NA	?	?	bent	bent	NA	NA	NA	bent	bent	separated	3	1	1	in the pot containing the body	0	0	0	0	0	0
660	IIIA1	IIIe	32.57950232	25.22978858	S	?	0	2_3	1_5	0	1	0	0	0	0	0	0	Jar	nothing	Jar	?	NA	NA	NA	NA	NA	0	brought in jar	seated	SE	ground	slightly bent	slightly bent	Abdomen	Abdomen	symmetry thorax	bent	bent	joined	4	1	2	against pot	0	0	0	0	0	1
708	IIIA1	IIIe	32.57961067	25.22959332	S	?	0	9-18 m	0-1	1	0	0	0	0	0	0	0	Jar	nothing	Jar	?	NA	NA	NA	NA	NA	0	in situ	right	S	E	bent	bent	knee	knee	symmetry leg	bent	bent	close	3	1	3	1 on skull 2 against jar neck	1	0	0	0	0	1
630	IIIA2	IIIe	32.57959285	25.2299278	S	?	0	12-18 m	1_5	0	1	0	0	0	0	0	0	Jar	nothing	Jar	?	NA	NA	NA	NA	NA	0	in situ	right	SE	ground	bent	bent	Abdomen	thorax	symmetry thorax	in extension	in extension	close	4	1	2	1 against bottom jar 1 against jar	0	0	1	0	0	1
934	IIID/3e dyn	3edyn	32.57940056	25.23062773	N	?	0	3_4	1_5	0	1	0	0	0	0	0	0	Coffin	wrap in mat	Coffin	?	mud	0.47	0.32	NA	0.02	0	hypercontraction	right	SE	ground	bent	bent	right leg	left leg	symmetry leg	hyper-bent	hyper-bent	joined	4	1	2	against outside corner of trunk	0	0	0	0	0	0
540	IIIA1	IIIe	32.57946974	25.23011599	S	?	0	12-18 m	1_5	0	1	0	0	0	0	0	0	Jar	nothing	Jar	?	NA	NA	NA	NA	NA	0	brought in jar	back	SE	ground	bent	bent	right hip	left hip	symmetry leg	bent	bent	NA	3	1	2	wedge jar	0	0	0	0	0	1
636	IIIA2	IIIe	32.57957581	25.2300213	S	?	0	2.5-3	1_5	0	1	0	0	0	0	0	0	Simple pit	nothing	Simple pit	?	NA	NA	NA	NA	NA	0	in situ	left	SE	ground_W	bent	bent	chin	face	symmetry head	slightly bent	slightly bent	close	2	1	4	3 against skull1 against shoulder	1	0	1	0	0	0
504	IIIA1-A2	IIIe	32.57954148	25.2300739	S	?	0	1_4	1_5	0	1	0	0	0	0	0	0	Simple pit	nothing	Simple pit	?	NA	NA	NA	NA	NA	0	hypercontraction	belly	S	ground	bent	NA	face	head	symmetry head	hyper-bent	hyper-bent	joined	2	1	2	to the right of the head	1	0	0	0	0	0
590	IIIA1-A2	IIIe	32.57962424	25.2297425	S	?	0	2_3	1_5	0	1	0	0	0	0	0	0	Jar	wrap in mat	Jar	?	NA	NA	NA	NA	NA	0	hypercontraction	right	S	E	bent	hyper-bent	left elbow	leg	asymmetry leg-thorax	hyper-bent	hyper-bent	separated	3	1	3	2 against jar 1 behind the head	1	0	0	0	0	1
544	IIIC	IIIm	32.57940626	25.23011323	S	?	0	4	1_5	0	1	0	0	0	0	0	0	Simple pit	nothing	Simple pit	?	NA	NA	NA	NA	NA	0	in situ	left	SE	W	bent	bent	thorax	thorax	symmetry thorax	bent	bent	close	3	1	5	1 in front of the body 1 on the skull 1 in front of the face 1 against the forearm contains the thumb	1	1	0	0	1	0
667	IIIA1	IIIe	32.57964924	25.22963686	S	?	0	18-24 m	1_5	0	1	0	0	0	0	0	0	Simple pit	nothing	Simple pit	?	NA	NA	NA	NA	NA	0	in situ	left	S	NW	bent	bent	thorax	face	asymmetry head-thorax	slightly bent	slightly bent	close	2	1	3	1 in front of forehead 1 between forearms 1 knees	1	1	1	0	0	0
970	IIIA2	IIIe	32.57957251	25.23019697	S	?	0	24 m	1_5	0	1	0	0	0	0	0	0	Simple pit	wrap in mat	Simple pit Wrapped	?	NA	NA	NA	NA	NA	0	in situ	left	SE	ground_W	bent	bent	thorax	thorax	symmetry thorax	bent	bent	separated	4	1	6	in front of the head	1	0	0	0	0	0
686	IID	IIt	32.57967289	25.22960934	S	?	0	18-24 m	1_5	0	1	0	0	0	0	0	0	Simple pit	nothing	Simple pit	?	NA	NA	NA	NA	NA	0	hypercontraction	left	S	W	bent	bent	face	face	symmetry head	bent	bent	joined	2	1	2	1 in front of the face 1 on forearm	1	0	1	0	0	0
548	IIIA1	IIIe	32.57951581	25.22983498	S	?	0	12 m	0-1	1	0	0	0	0	0	0	0	Jar	nothing	Jar	?	NA	NA	NA	NA	NA	0	in situ	belly	S	SW	bent	bent	?	?	?	bent	bent	NA	4	1	2	calle jarre against pit wall	0	0	0	0	0	1
893	?	?	32.57943865	25.23086715	N	?	0	1.5	1_5	0	1	0	0	0	0	0	0	Simple pit	nothing	Simple pit	?	NA	NA	NA	NA	NA	0	hypercontraction	right	E	NW	bent	bent	NA	NA	NA	hyper-bent	hyper-bent	joined	2	1	1	above the body	0	0	0	0	0	0
680	IID	IIt	32.57971727	25.2296133	S	?	0	6-12 m	0-1	1	0	0	0	0	0	0	0	Jar	nothing	Jar	?	NA	NA	NA	NA	NA	0	hypercontraction	belly	SE	ground_SE	bent	bent	thorax	thorax	symmetry thorax	bent	bent	separated	3	1	1	south of the jar	0	0	0	0	0	1
629	IID-IIIA1	IIt	32.57982659	25.22974818	S	?	0	12-18 m	1_5	0	1	0	0	0	0	0	0	Simple pit	nothing	Simple pit	?	NA	NA	NA	NA	NA	3	in situ	left	SE	ground_W	bent	bent	face	face	symmetry head	bent	bent	separated	2	1	1	behind the head	0	0	0	0	0	0
160	IIID/3e dyn	3edyn	32.57947533	25.23060094	N	?	0	3_4	1_5	0	1	0	0	0	0	0	0	Coffin	nothing	Coffin	?	mud	0.44	0.27	?	?	0	in situ	left	NA	W	bent	bent	face	chin	symmetry head	bent	bent	close	4	1	1	on mat	0	0	0	0	0	0
756	IIIA2	IIIe	32.57958415	25.23022402	S	?	0	1_2	1_5	0	1	0	0	0	0	0	0	Simple pit	nothing	Simple pit	?	NA	NA	NA	NA	NA	0	hypercontraction	belly	SE	SW	in extension	bent	left knee	neck	asymmetry leg-head	bent	bent	separated	3	1	2	10cm from feet	0	1	0	0	0	0
499	IIIA2	IIIe	32.57944721	25.23004264	S	?	0	0_1	0-1	1	0	0	0	0	0	0	0	Simple pit	nothing	NA	?	NA	NA	NA	NA	NA	0	hypercontraction	back	SW	SE	hyper-bent	hyper-bent	head	head	symmetry head	bent	bent	NA	2	1	3	2 at head level 1 vertical to foot	1	1	0	0	0	0
582	IID	IIt	32.57960881	25.22968172	S	?	0	2.5-3	1_5	0	1	0	0	0	0	0	0	Simple pit	nothing	Simple pit	?	NA	NA	NA	NA	NA	0	in situ	left	E	S	bent	in extension	left forearm	knee	asymmetry leg-thorax	bent	bent	joined	3	1	3	2 behind the head 1 behind the pelvis	1	0	1	0	0	0
977	IIIA2	IIIe	32.57961241	25.23015275	S	?	0	1_2	1_5	0	1	0	0	0	0	0	0	Simple pit	nothing	Simple pit	?	NA	NA	NA	NA	NA	0	in situ	left	SE	W	bent	bent	face	face	symmetry head	bent	bent	close	2	1	1	at the feet	0	1	0	0	0	0
890	3e dyn	3edyn	32.57946505	25.230842	N	?	0	2-2.5	1_5	0	1	0	0	0	0	0	0	Jar	nothing	Jar	?	NA	NA	NA	NA	NA	0	hypercontraction	back	W	NE	bent	bent	thorax	face	asymmetry head-thorax	hyper-bent	hyper-bent	separated	2	1	1	calle urn	0	0	0	0	0	1
815	IIIA1	IIIe	32.57969936	25.22976759	S	?	0	1_2	1_5	0	1	0	0	0	0	0	0	Jar	nothing	Jar	?	NA	NA	NA	NA	NA	0	in situ	left	SE	NW	bent	in extension	face	right leg	asymmetry head-thorax	bent	bent	joined	3	1	1	against bottom of jar	0	0	0	0	0	1
707	IIIA1	IIIe	32.57960052	25.22964647	S	?	0	6-9 m	0-1	1	0	0	0	0	0	0	0	Jar	nothing	Jar	?	NA	NA	NA	NA	NA	0	hypercontraction	left	SE	ground_S	bent	bent	face	face	symmetry head	bent	bent	separated	3	1	1	against bottom of jar	0	0	0	0	0	1
690	IID-IIIA1	IIt	32.57974024	25.22952988	S	?	0	3_4	1_5	0	1	0	0	0	0	0	0	Simple pit	nothing	Simple pit	?	NA	NA	NA	NA	NA	0	hypercontraction	left	E	W	bent	in extension	face	leg	asymmetry leg-head	bent	bent	joined	2	1	1	against forehead	1	0	0	0	0	0
688	IID	IIt	32.57969515	25.22955117	S	?	0	18-24 m	1_5	0	1	0	0	0	0	0	0	Jar	nothing	Jar	?	NA	NA	NA	NA	NA	0	hypercontraction	back	NE	ground	bent	bent	abdomen	thorax	symmetry thorax	bent	bent	separated	3	1	1	against jar	0	0	0	0	0	1
638	IIIA1	IIIe	32.57959828	25.22997537	S	?	0	5	1_5	0	1	0	0	0	0	0	0	Jar	wrap in mat	Jar	0	NA	NA	NA	NA	NA	0	hypercontraction	left	SE	ground	bent	bent	thorax	face	asymmetry head-thorax	bent	bent	separated	4	1	1	against jar	0	0	0	0	0	1
942	IIID/3e dyn	3edyn	32.5793764	25.230465	N	?	0	24-30 m	1_5	0	1	0	0	0	0	0	0	Jar	nothing	Jar	?	NA	NA	NA	NA	NA	0	hypercontraction	left	N	SE	bent	in extension	face	thorax	asymmetry head-thorax	hyper-bent	hyper-bent	joined	3	1	3	against jar	0	0	0	0	0	1
715	IIIA1	IIIe	32.57977331	25.2296834	S	?	0	18-24 m	1_5	0	1	0	0	0	0	0	0	Jar	nothing	Jar	?	NA	NA	NA	NA	NA	0	hypercontraction	left	SE	W	bent	bent	face	knee	asymmetry leg-head	bent	bent	separated	3	1	1	against jar	0	0	0	0	0	1
717	IID	IIt	32.57976591	25.22971332	S	?	0	6-12 m	0-1	1	0	0	0	0	0	0	0	Jar	wrap in mat	Jar	?	NA	NA	NA	NA	NA	0	NA	left	SE	W	bent	bent	face	left leg	asymmetry leg-head	bent	bent	joined	3	1	1	against jar	0	0	0	0	0	1
871	3e dyn	3edyn	32.57945605	25.23078381	N	?	0	2_3	1_5	0	1	0	0	0	0	0	0	Jar	nothing	Jar	?	NA	NA	NA	NA	NA	0	in situ	left	W	sky	bent	bent	right leg	leg	symmetry leg	bent	bent	joined	3	1	1	against jar	0	0	0	0	0	1
880	3e dyn	3edyn	32.57952411	25.23081916	N	?	0	1.5-2	1_5	0	1	0	0	0	0	0	0	Jar	nothing	Jar	?	NA	NA	NA	NA	NA	0	NA	belly	E	ground	slightly bent	slightly bent	thorax	thorax	symmetry thorax	bent	bent	joined	3	1	1	against jar	0	0	0	0	0	1
817	IIIA1	IIIe	32.57970969	25.2297908	S	?	0	12-18 m	1_5	0	1	0	0	0	0	0	0	Jar	nothing	Jar	?	NA	NA	NA	NA	NA	0	in situ	right	E	ground	bent	bent	face	thorax	asymmetry head-thorax	hyper-bent	hyper-bent	joined	3	1	1	against jar	0	0	0	0	0	1
607	IIIA2	IIIe	32.5795784	25.2298029	S	?	0	18-24 m	1_5	0	1	0	0	0	0	0	0	Jar	wrap in mat	Jar	?	NA	NA	NA	NA	NA	0	hypercontraction	left	SE	W	bent	bent	face	leg	asymmetry leg-head	hyper-bent	hyper-bent	close	3	1	1	against jar	0	0	0	0	0	1
818	IIIA1	IIIe	32.57971826	25.22979612	S	?	0	3-6 m	0-1	1	0	0	0	0	0	0	0	Jar	nothing	Jar	?	NA	NA	NA	NA	NA	0	in situ	left	S	ground	bent	in extension	right hip	knee	symmetry leg	bent	bent	close	3	1	2	against jar	0	0	0	0	0	1
736	IIIA1-A2	IIIe	32.57956547	25.23025538	S	?	0	6 m	0-1	1	0	0	0	0	0	0	0	Jar	nothing	Jar	?	NA	NA	NA	NA	NA	0	in situ	belly	N	ground	bent	bent	right knee	face	asymmetry leg-head	bent	bent	separated	4	1	1	against jar	0	0	0	0	0	1
914	3e dyn	3edyn	32.57945726	25.23088291	N	?	0	4	1_5	0	1	0	0	0	0	0	0	Jar	nothing	Jar	?	NA	NA	NA	NA	NA	0	in situ	back	NA	NA	bent	slightly bent	right knee	Abdomen	asymmetry leg-thorax	bent	bent	joined	3	1	3	1 against jar 2 indetermines	0	0	0	0	0	1
822	IIIA1	IIIe	32.57965657	25.22984743	S	?	0	9 m	0-1	1	0	0	0	0	0	0	0	Jar	nothing	Jar	?	NA	NA	NA	NA	NA	0	in situ	left	NE	N	slightly bent	in extension	right foot	knee	symmetry leg	bent	bent	joined	4	1	3	1 against jar 2 under jar	0	0	0	0	0	1
966	IIIA2	IIIe	32.57957519	25.23028884	S	?	0	12-18 m	1_5	0	1	0	0	0	0	0	0	Simple pit	nothing	Simple pit	?	NA	NA	NA	NA	NA	0	in situ	left	SE	W	bent	bent	head	face	symmetry head	bent	bent	separated	2	1	1	against the face	1	0	0	0	0	0
512	IIIA1-A2	IIIe	32.5795095	25.23020268	S	?	0	1_4	1_5	0	1	0	0	0	0	0	0	Jar	nothing	Jar	?	NA	NA	NA	NA	NA	0	in situ	right	NW	S	bent	bent	face	face	symmetry head	bent	bent	joined	3	1	1	against the jar	0	0	0	0	0	1
508	IIIB	IIIm	32.57954995	25.23009968	S	?	0	1_4	1_5	0	1	0	0	0	0	0	0	Simple pit	nothing	Simple pit	?	NA	NA	NA	NA	NA	0	in situ	left	SE	ground	bent	bent	face	face	symmetry head	bent	bent	joined	3	1	3	1 against the skull 1 against the elbow 1 25 cm above the skull	1	0	1	0	0	0
539	IIIA1-A2	IIIe	32.57946559	25.23014197	S	?	0	12 m	1_5	0	1	0	0	0	0	0	0	Jar	nothing	Jar	?	NA	NA	NA	NA	NA	0	brought in jar	back	SE	N	in extension	in extension	left knee	left hip	symmetry leg	bent	bent	NA	3	1	2	1 against the bottom of the jar 1 on the jar	0	0	0	0	0	1
969	IIIA1-A2	IIIe	32.57956584	25.23016696	S	?	0	12-24 m	1_5	0	1	0	0	0	0	0	0	Simple pit	wrap in mat	Simple pit Wrapped	?	NA	NA	NA	NA	NA	0	NA	back	S	E	bent	bent	left shoulder	left shoulder	symmetry thorax	bent	bent	separated	2	1	1	against the hands	0	0	1	0	0	0
572	IIIA1-A2	IIIe	32.57954306	25.22977763	S	?	0	6-12 m	0-1	1	0	0	0	0	0	0	0	Jar	nothing	Jar	?	NA	NA	NA	NA	NA	0	in situ	right	S	ground	bent	bent	pelvis	hip	symmetry leg	bent	bent	joined	3	1	1	against wall	0	0	0	0	0	0
744	IIIA1-A2	IIIe	32.57957609	25.23035027	S	?	0	18-24 m	1_5	0	1	0	0	0	0	0	0	Simple pit	nothing	Simple pit	?	NA	NA	NA	NA	NA	0	NA	left	E	SE	bent	bent	right shoulder	chin	asymmetry head-thorax	bent	bent	separated	2	1	1	against pit wall	0	0	0	0	0	0
746	IIIA1-A2	IIIe	32.57958518	25.23034363	S	?	0	newborn-3 m	0-1	1	0	0	0	0	0	0	0	Jar	nothing	Jar	?	NA	NA	NA	NA	NA	0	NA	back	NW	ground	bent	bent	abdomen	left knee	asymmetry leg-thorax	bent	bent	close	3	1	2	1 along left side of body 1 along side of face	0	0	0	0	0	0
851	IIID/3e dyn	3edyn	32.57942351	25.23065627	N	?	0	1_4	1_5	0	1	0	0	0	0	0	0	Jar	nothing	Jar	?	NA	NA	NA	NA	NA	0	in situ	right	E	sky	bent	bent	head	right elbow	asymmetry head-thorax	bent	bent	joined	3	1	2	jar opening	0	0	0	0	0	0
408	IIID/3e dyn	3edyn	32.57951387	25.23051366	N	?	0	6-12 m	0-1	1	0	0	0	0	0	0	0	Jar	nothing	Jar	?	NA	NA	NA	NA	NA	1	NA	NA	?	?	NA	NA	NA	NA	NA	NA	NA	NA	NA	1	1	1 near top of head 1 on left hand	0	0	0	0	0	0
606	IIIA1	IIIe	32.57959538	25.22978277	S	?	0	4_5	1_5	0	1	0	0	0	0	0	0	Simple pit	nothing	Simple pit	?	NA	NA	NA	NA	NA	2	NA	left	S	N	NA	NA	NA	NA	NA	bent	bent	NA	2	1	3	near head	0	0	0	0	0	0
803	IIIA1-A2	IIIe	32.57962163	25.23037819	S	?	0	6-9 m	0-1	1	0	0	0	0	0	0	0	Jar	nothing	Jar	?	NA	NA	NA	NA	NA	0	brought in jar	left	SE	NW	bent	slightly bent	thorax	left ankle	asymmetry leg-thorax	hyper-bent	hyper-bent	joined	2	1	1	top of skull	0	0	0	0	0	0
602	IIIA2	IIIe	32.57959885	25.22971794	S	?	0	2.5-4	1_5	0	1	0	0	0	0	0	0	Simple pit	nothing	Simple pit	?	NA	NA	NA	NA	NA	2	NA	left	N	?	NA	NA	NA	NA	NA	NA	NA	NA	2	1	1	1 top of the head 1 one layer on the back	0	0	0	0	0	0
778	IIID	IIIt	32.57962968	25.23036239	S	?	0	6-12 m	0-1	1	0	0	0	0	0	0	0	Simple pit	nothing	NA	?	NA	NA	NA	NA	NA	1	NA	NA	NA	NA	NA	NA	NA	NA	NA	NA	NA	NA	2	1	1	top of the head	0	0	0	0	0	0
887	3e dyn	3edyn	32.57947329	25.23082706	N	?	0	newborn	0-1	1	0	0	0	0	0	0	0	Jar	nothing	Jar	?	NA	NA	NA	NA	NA	4	NA	NA	NA	NA	NA	NA	NA	NA	NA	NA	NA	NA	3	1	1	1 top of the head 1 in front of the legs	0	0	0	0	0	0
599	IID-IIIA1	IIt	32.5796467	25.22971918	S	?	0	5_6	5_10	0	0	1	0	0	0	0	0	Simple pit	nothing	NA	?	NA	NA	NA	NA	NA	2	NA	NA	S	?	NA	NA	NA	NA	NA	NA	NA	NA	2	1	2	under body	0	0	0	0	0	0
471	IIID/3e dyn	3edyn	32.57951215	25.23076991	N	F	1	>19	>19	0	0	0	0	0	1	0	1	Simple pit	wrap in mat	NA	?	NA	NA	NA	NA	NA	0	hypercontraction	back	N	SE	bent	bent	left leg	Abdomen	asymmetry leg-thorax	hyper-bent	hyper-bent	joined	3	1	19	1 under 1 on the body	0	0	0	0	0	0
453	IIID/3e dyn	3edyn	32.57945502	25.23047305	N	?	0	5_9	5_10	0	0	1	0	0	0	0	0	Coffin	nothing	NA	?	mud	0.93	0.55	?	0.02-0.03	3	NA	NA	NW	NA	NA	NA	NA	NA	NA	NA	NA	NA	4	1	1	under the hip	0	0	0	0	0	0
168	IIID/3e dyn	3edyn	32.57944165	25.23052335	N	?	0	12_15	12_15	0	0	0	1	0	0	0	1	Simple pit	nothing	NA	?	NA	NA	NA	NA	NA	0	hypercontraction	right	S	E	bent	bent	face	leg	asymmetry leg-head	hyper-bent	hyper-bent	close	2	1	1	1 under the elbow 1 knee	0	0	0	0	0	0
834	IIIA2	IIIe	32.57939932	25.23056081	N	?	0	1_4	1_5	0	1	0	0	0	0	0	0	Coffin	wrap in mat	Coffin	?	mud	0.4	0.24	0.13	NA	0	hypercontraction	left	E	NW	bent	bent	face	face	symmetry head	bent	bent	joined	4	1	1	1 against wall 1 box	0	0	0	0	0	0
860	IIID/3e dyn	3edyn	32.57941191	25.23071142	N	?	0	1.5-2	1_5	0	1	0	0	0	0	0	0	Jar	nothing	Jar	?	NA	NA	NA	NA	NA	0	NA	back	S	N	bent	bent	thorax	thorax	symmetry thorax	bent	bent	separated	2	0	0	jar opening	0	0	0	0	0	0
759	IIIA1-A2	IIIe	32.57960363	25.23018405	S	?	0	6-9 m	0-1	1	0	0	0	0	0	0	0	Jar	wrap in mat	Jar	?	NA	NA	NA	NA	NA	0	hypercontraction	left	SE	ground	bent	bent	face	face	symmetry head	bent	bent	separated	3	0	0	1 near top of head 1 on left hand	0	0	0	0	0	0
829	IIIA1	IIIe	32.5797578	25.22979633	S	?	0	newborn-3 m	0-1	1	0	0	0	0	0	0	0	Jar	nothing	Jar	?	NA	NA	NA	NA	NA	0	in situ	left	SE	NW	in extension	bent	abdomen	left hip	asymmetry leg-thorax	bent	bent	separated	2	0	0	near head	0	0	0	0	0	0
981	3e dyn	3edyn	32.57953717	25.23083361	N	?	0	12-18 m	1_5	0	1	0	0	0	0	0	0	Jar	nothing	Jar	?	NA	NA	NA	NA	NA	0	hypercontraction	belly	W	ground	bent	bent	thorax	right elbow	symmetry thorax	hyper-bent	hyper-bent	joined	3	0	0	top of skull	0	0	0	0	0	0
410	3e dyn	3edyn	32.57949407	25.23056327	N	?	0	6 m +/- 3	0-1	1	0	0	0	0	0	0	0	Simple pit	wrap under jar	in pit under jar	?	NA	NA	NA	NA	NA	0	hypercontraction	prone	S	ground	hyper-bent	in extension	head	hip	asymmetry leg-head	hyper-bent	hyper-bent	joined	3	0	0	1 top of the head 1 one layer on the back	0	0	0	0	0	0
709	IIC	IIm	32.57960583	25.22958639	S	?	0	newborn	0-1	1	0	0	0	0	0	0	0	Jar	nothing	Jar	?	NA	NA	NA	NA	NA	0	in situ	left	SE	S	bent	bent	abdomen	Abdomen	symmetry thorax	bent	bent	separated	2	0	0	top of the head	0	0	0	0	0	0
502	IIIA2	IIIe	32.57952455	25.23006258	S	?	0	1_4	1_5	0	1	0	0	0	0	0	0	Jar	nothing	Jar	?	NA	NA	NA	NA	NA	0	brought in jar	seated	?	ground	slightly bent	slightly bent	pelvis	left leg	symmetry leg	hyper-bent	hyper-bent	joined	2	0	0	1 top of the head 1 in front of the legs	0	0	0	0	0	0
154	IIID/3e dyn	3edyn	32.57943767	25.23062958	N	?	0	0-3 m	0-1	1	0	0	0	0	0	0	0	Jar	nothing	Jar	?	NA	NA	NA	NA	NA	0	NA	left	?	S	bent	bent	thorax	thorax	symmetry thorax	slightly bent	slightly bent	close	2	0	0	under body	0	0	0	0	0	0
1000	3e dyn	3edyn	32.57954149	25.23088889	N	F	1	>19	>19	0	0	0	0	0	1	0	1	Coffin	wrap in mat	NA	?	wood	0.9	0.51	0.2	0.02	0	NA	right	N	SW	bent	bent	face	face	symmetry head	bent	bent	joined	4	0	0	1 under 1 on the body	0	0	0	0	0	0
928	IIID/3e dyn	3edyn	32.57940581	25.23070842	N	?	0	13-15	12_15	0	0	0	1	0	0	0	1	Simple pit	NA	NA	NA	NA	NA	NA	NA	NA	4	NA	NA	S	NA	NA	NA	NA	NA	NA	NA	NA	NA	NA	0	0	under the hip	0	0	0	0	0	0
951	IIID/3e dyn	3edyn	32.5793826	25.23074133	N	?	0	newborn-6 m	0-1	1	0	0	0	0	0	0	0	Simple pit	NA	NA	?	NA	NA	NA	NA	NA	4	NA	NA	NA	?	NA	NA	NA	NA	NA	NA	NA	NA	1	0	0	1 under the elbow 1 knee	0	0	0	0	0	0
938	IIIA2-IIIC	IIIm	32.57937928	25.23055923	N	?	0	9	5_10	0	0	1	0	0	0	0	0	Simple pit	NA	NA	NA	NA	NA	NA	NA	NA	4	NA	NA	NA	NA	NA	NA	NA	NA	NA	NA	NA	NA	NA	0	0	under the lower limb	0	0	0	0	0	0
956	IIID/3e dyn	3edyn	32.57938406	25.23085592	N	?	0	18 m	1_5	0	1	0	0	0	0	0	0	Simple pit	NA	Simple pit	?	NA	NA	NA	NA	NA	4	NA	left	S	W	NA	NA	NA	NA	NA	NA	NA	NA	1	0	0	1 on abdomen 1 on head 1 on left side	0	0	0	0	0	0
967	IIIA1	IIIe	32.57964011	25.23020892	S	?	0	1_4	1_5	0	1	0	0	0	0	0	0	Jar	nothing	Jar	?	NA	NA	NA	NA	NA	2	NA	left	S	NA	NA	NA	NA	NA	NA	NA	NA	NA	2	0	0	1 on forearm 1 in front of face	0	0	0	0	0	0
949	IIID/3e dyn	3edyn	32.5793872	25.23071262	N	?	0	18-24 m	1_5	0	1	0	0	0	0	0	0	Jar	nothing	Jar	?	NA	NA	NA	NA	NA	0	NA	back	SE	NE	bent	bent	NA	NA	NA	NA	NA	NA	2	0	0	on a block of stone	0	0	0	0	0	0
929	IIID/3e dyn	3edyn	32.57940029	25.23070397	N	?	0	6 m	0-1	1	0	0	0	0	0	0	0	Coffin	nothing	NA	?	mud	NA	NA	NA	NA	1	NA	NA	NA	NA	NA	NA	NA	NA	NA	NA	NA	NA	2	0	0	on body	0	0	0	0	0	0
947	?	NA	32.57936364	25.23060363	N	?	0	1_4	1_5	0	1	0	0	0	0	0	0	Coffin	nothing	Coffin	?	mud	0.5	0.4	NA	0.03	4	NA	right	E	N	bent	NA	right pelvis	leg	symmetry leg	NA	NA	NA	3	0	0	on body	0	0	0	0	0	0
156	IIID/3e dyn	3edyn	32.57945964	25.23061129	N	?	0	foetus	0-1	1	0	0	0	0	0	0	0	Jar	nothing	Jar	?	NA	NA	NA	NA	NA	0	NA	NA	SE	?	bent	bent	NA	NA	NA	hyper-bent	hyper-bent	NA	2	0	0	on skull	0	0	0	0	0	0
155	IIID/3e dyn	3edyn	32.57944284	25.23064021	N	?	0	3-6 m	0-1	1	0	0	0	0	0	0	0	Jar	nothing	Jar	0	NA	NA	NA	NA	NA	0	NA	NA	?	E	NA	NA	NA	NA	NA	NA	NA	NA	2	0	0	on skull	0	0	0	0	0	0
580	IID-IIIA1	IIt	32.57958655	25.22968962	S	?	0	3 m	0-1	1	0	0	0	0	0	0	0	Jar	nothing	Jar	?	NA	NA	NA	NA	NA	0	in situ	left	S	E	bent	bent	left shoulder	left knee	asymmetry leg-thorax	bent	bent	joined	2	0	0	on trunk opening	0	0	0	0	0	0
542	IIIA1-A2	IIIe	32.57943851	25.23010718	S	?	0	9-12 m	0-1	1	0	0	0	0	0	0	0	Jar	nothing	Jar	?	NA	NA	NA	NA	NA	0	brought in jar	left	SE	W	in extension	NA	right knee	leg	symmetry leg	bent	bent	NA	4	1	1	1 on foot 1 under pelvis	0	0	0	0	0	0
448	IIIA2-IIID	IIIm	32.57951429	25.23040603	S	?	0	1_4	1_5	0	1	0	0	0	0	0	0	Simple pit	nothing	Simple pit	?	NA	NA	NA	NA	NA	0	in situ	left	SE	ground	bent	bent	face	face	symmetry head	bent	bent	crossed	1	0	0	on head	0	0	0	0	0	0
566	IIIA1-A2	IIIe	32.57954442	25.23002646	S	?	0	?	?	0	0	0	0	0	0	0	0	Jar	nothing	Jar	?	NA	NA	NA	NA	NA	0	NA	right	SE	?	NA	NA	NA	NA	NA	bent	bent	NA	3	0	0	1 in bowl 1 on knees 1 against head 1 at subject's feet	0	0	0	0	0	0
495	IIIA2	IIIe	32.5795336	25.23009764	S	?	0	0_1	0-1	1	0	0	0	0	0	0	0	Simple pit	wrap in mat	NA	?	NA	NA	NA	NA	NA	0	in situ	left	SE	W	bent	bent	face	face	symmetry head	bent	bent	joined	2	0	0	1 on the head 1 on the shoulder 1 on the long left arm 1 covers the lower part of the body	0	0	0	0	0	0
913	IIID/3e dyn	3edyn	32.57941889	25.23044242	N	?	0	6-12m	0-1	1	0	0	0	0	0	0	0	Coffin	wrap in mat	NA	?	wood	NA	NA	NA	NA	0	hypercontraction	prone	NW	ground	bent	bent	left hip	Abdomen	asymmetry leg-thorax	hyper-bent	hyper-bent	joined	2	0	0	empty	0	0	0	0	0	0
941	IIID/3e dyn	3edyn	32.57938509	25.23052097	N	?	0	4_5	1_5	0	1	0	0	0	0	0	0	Simple pit	nothing	Simple pit	?	NA	NA	NA	NA	NA	0	hypercontraction	prone	S	ground	bent	bent	thorax	thorax	symmetry thorax	hyper-bent	hyper-bent	joined	2	0	0		0	0	0	0	0	0
567	?	NA	32.57950641	25.22997997	S	?	0	2_3	1_5	0	1	0	0	0	0	0	0	Simple pit	nothing	Simple pit	?	NA	NA	NA	NA	NA	0	in situ	left	S	NW	bent	in extension	thorax	left leg	asymmetry leg-thorax	bent	bent	close	1	0	0		0	0	0	0	0	0
682	IID-IIIA1	IIt	32.57970122	25.22958696	S	?	0	6 m	0-1	1	0	0	0	0	0	0	0	Jar	nothing	Jar	?	NA	NA	NA	NA	NA	0	in situ	back	NW	ground_SW	in extension	slightly bent	thorax	pelvis	symmetry thorax	bent	bent	separated	3	0	0		0	0	0	0	0	0
867	IIID/3e dyn	3edyn	32.579438	25.23072872	N	?	0	2.5	1_5	0	1	0	0	0	0	0	0	Simple pit	nothing	Simple pit	?	NA	NA	NA	NA	NA	0	hypercontraction	left	W	ground	bent	bent	head	face	symmetry head	in extension	hyper-bent	separated	1	0	0		0	0	0	0	0	0
868	IIID/3e dyn	3edyn	32.5794246	25.2307628	N	F	1	>19	>19	0	0	0	0	0	1	0	1	Simple pit	nothing	NA	?	NA	NA	NA	NA	NA	0	in situ	right	E	NW	bent	bent	face	face	symmetry head	slightly bent	slightly bent	separated	1	0	0		0	0	0	0	0	0
978	?	NA	32.57958029	25.23027187	S	?	0	3_4	1_5	0	1	0	0	0	0	0	0	Simple pit	nothing	Simple pit	?	NA	NA	NA	NA	NA	0	in situ	left	E	ground	bent	bent	face	face	symmetry head	bent	bent	joined	1	0	0		0	0	0	0	0	0
861	IIID/3e dyn	3edyn	32.57943322	25.23070059	N	?	0	7	5_10	0	0	1	0	0	0	0	0	Simple pit	nothing	NA	?	NA	NA	NA	NA	NA	0	hypercontraction	back	NW	NE	bent	bent	thorax	thorax	symmetry thorax	bent	bent	joined	1	0	0		0	0	0	0	0	0
833	IIIA2	IIIe	32.57940672	25.23055615	N	F	1	>30	>19	0	0	0	0	0	1	0	1	Simple pit	nothing	NA	?	NA	NA	NA	NA	NA	0	hypercontraction	left	W	NW	bent	in extension	left shoulder	left leg	asymmetry leg-thorax	hyper-bent	hyper-bent	joined	1	0	0		0	0	0	0	0	0
996	3e dyn	3edyn	32.57952611	25.23086477	N	?	0	4_5	1_5	0	1	0	0	0	0	0	0	Simple pit	nothing	Simple pit	?	NA	NA	NA	NA	NA	0	hypercontraction	left	SE	W	bent	bent	face	face	symmetry head	hyper-bent	hyper-bent	joined	1	0	0		0	0	0	0	0	0
986	3e dyn	3edyn	32.57955278	25.23088469	N	?	0	2-2.5	1_5	0	1	0	0	0	0	0	0	Simple pit	nothing	Simple pit	?	NA	NA	NA	NA	NA	0	hypercontraction	left	N	E	NA	bent	thorax	thorax	symmetry thorax	hyper-bent	hyper-bent	joined	1	0	0		0	0	0	0	0	0
891	IIID/3e dyn	3edyn	32.57947277	25.2308496	N	?	0	2.5-3	1_5	0	1	0	0	0	0	0	0	Simple pit	nothing	Simple pit	?	NA	NA	NA	NA	NA	4	NA	head	E	S	bent	bent	head	face	symmetry head	NA	NA	NA	1	0	0		0	0	0	0	0	0
777	IIID	IIIt	32.57963095	25.23034169	S	?	0	6 m	0-1	1	0	0	0	0	0	0	0	Simple pit	nothing	NA	?	NA	NA	NA	NA	NA	0	in situ	belly	SE	ground	bent	bent	face	thorax	asymmetry head-thorax	bent	bent	close	1	0	0		0	0	0	0	0	0
615	?	NA	32.5794629	25.22995874	S	?	0	4_5	1_5	0	1	0	0	0	0	0	0	Simple pit	nothing	Simple pit	?	NA	NA	NA	NA	NA	0	in situ	belly	SE	S	hyper-bent	in extension	right shoulder	left knee	asymmetry leg-thorax	bent	bent	close	1	0	0		0	0	0	0	0	0
935	IIID/3e dyn	3edyn	32.57941071	25.23062944	N	?	0	1 +/- 4	1_5	0	1	0	0	0	0	0	0	Simple pit	basket	Simple pit in Basket	?	NA	NA	NA	NA	NA	0	hypercontraction	right	NE	W	in extension	in extension	thorax	thorax	symmetry thorax	bent	bent	close	1	0	0		0	0	0	0	0	0
632	IIIA1	IIIe	32.57959851	25.22995695	S	?	0	9-12 m	0-1	1	0	0	0	0	0	0	0	Jar	nothing	Jar	?	NA	NA	NA	NA	NA	0	in situ	left	SE	NW	bent	bent	face	face	symmetry head	bent	bent	separated	2	0	0		0	0	0	0	0	0
825	IID-IIIA2	IIt	32.5796239	25.23012838	S	?	0	18-24 m	1_5	0	1	0	0	0	0	0	0	Simple pit	nothing	Simple pit	?	NA	NA	NA	NA	NA	0	hypercontraction	left	SE	SW	bent	bent	chin	chin	symmetry head	bent	bent	joined	2	0	0		0	0	0	0	0	0
645	IID-IIIA2	IIt	32.5795171	25.23018704	S	?	0	9 m	0-1	1	0	0	0	0	0	0	0	Jar	nothing	Jar	?	NA	NA	NA	NA	NA	0	in situ	left	SE	ground	in extension	in extension	knee	knee	symmetry leg	bent	bent	joined	2	0	0		0	0	0	0	0	0
613	IIC-IID	IIt	32.57976348	25.22954173	S	?	0	6-9 m	0-1	1	0	0	0	0	0	0	0	Jar	nothing	Jar	?	NA	NA	NA	NA	NA	0	hypercontraction	left	SE	ground_N	bent	in extension	face	left leg	asymmetry leg-head	hyper-bent	hyper-bent	joined	2	0	0		0	0	0	0	0	0
591	IIIA1	IIIe	32.57967531	25.22973533	S	?	0	12-18 m	1_5	0	1	0	0	0	0	0	0	Jar	wrap in mat	Jar	?	NA	NA	NA	NA	NA	0	hypercontraction	right	NE	W	bent	bent	knee	knee	symmetry leg	hyper-bent	hyper-bent	joined	2	0	0		0	0	0	0	0	0
976	IIIA1-A2	IIIe	32.57953055	25.23026302	S	?	0	2_4	1_5	0	1	0	0	0	0	0	0	Simple pit	nothing	Simple pit	?	NA	NA	NA	NA	NA	0	in situ	left	SE	NW	bent	slightly bent	face	leg	asymmetry leg-head	bent	bent	close	2	0	0		0	0	0	0	0	0
955	IIID/3e dyn	3edyn	32.57939642	25.23082651	N	?	0	4_5	1_5	0	1	0	0	0	0	0	0	Jar	nothing	Jar	?	NA	NA	NA	NA	NA	0	in situ	seated	W	ground	bent	bent	face	left hip	asymmetry leg-head	hyper-bent	hyper-bent	crossed	3	0	0		0	0	0	0	0	0
720	IIIA1-A2	IIIe	32.57954183	25.23032065	S	?	0	2.5-3	1_5	0	1	0	0	0	0	0	0	Jar	nothing	Jar	?	NA	NA	NA	NA	NA	0	in situ	left	SE	W	bent	bent	face	face	symmetry head	bent	bent	separated	3	0	0		0	0	0	0	0	0
933	IIID/3e dyn	3edyn	32.57940041	25.2306456	N	?	0	6-12 m	0-1	1	0	0	0	0	0	0	0	Coffin	nothing	NA	?	mud	0.52	0.34	NA	0.035	0	in situ	belly	S	SE	bent	in extension	pelvis	thorax	symmetry thorax	bent	bent	separated	3	0	0		0	0	0	0	0	0
771	IIIA1	IIIe	32.57964435	25.23025264	S	?	0	1.5-2	1_5	0	1	0	0	0	0	0	0	Jar	nothing	Jar	?	NA	NA	NA	NA	NA	0	in situ	back	SE	NE	bent	bent	abdomen	face	asymmetry head-thorax	hyper-bent	hyper-bent	separated	3	0	0		0	0	0	0	0	0
943	IIID/3e dyn	3edyn	32.57942975	25.23072857	N	?	0	8_9	5_10	0	0	1	0	0	0	0	0	Coffin	wrap in mat	NA	?	mud	0.55	0.39	0	0.06	0	hypercontraction	left	NW	SE	bent	bent	head	face	symmetry head	hyper-bent	hyper-bent	joined	3	0	0		0	0	0	0	0	0
836	IIID/3e dyn	3edyn	32.57942693	25.23058162	N	?	0	12-18 m	1_5	0	1	0	0	0	0	0	0	Coffin	nothing	Coffin	?	mud	0.5	0.33	NA	NA	0	hypercontraction	back	SW	N	bent	bent	thorax	thorax	symmetry thorax	hyper-bent	hyper-bent	joined	4	0	0		0	0	0	0	0	0
903	IIIA2-IIID	IIIm	32.57940959	25.23053977	N	?	0	0-6 m	0-1	1	0	0	0	0	0	0	0	Coffin	nothing	NA	?	mud	0.45	0.38	0.14	0.02-0.03	0	in situ	left	SE	W	in extension	bent	thorax	thorax	symmetry thorax	bent	bent	separated	5	0	0		0	0	0	0	0	0
985	3e dyn	3edyn	32.57952209	25.2308543	N	?	1	>30	>19	0	0	0	0	0	1	0	1	Coffin	nothing	NA	?	mud	0.8	0.47	0.4	0.04	0	hypercontraction	left	NW	ground	bent	bent	thorax	left knee	asymmetry leg-thorax	hyper-bent	hyper-bent	joined	4	1	1		0	0	0	0	0	0
523	IIIA1-A2	IIIe	32.57952738	25.23011309	S	?	0	6_9	5_10	0	0	1	0	0	0	0	0	Simple pit	nothing	NA	?	NA	NA	NA	NA	NA	0	in situ	left	S	W	bent	bent	left elbow	neck	asymmetry head-thorax	bent	bent	separated	1	0	0		0	0	0	0	0	0
758	IIIA1-A2	IIIe	32.57958972	25.23020223	S	?	0	8-12 m	0-1	1	0	0	0	0	0	0	0	Simple pit	nothing	NA	?	NA	NA	NA	NA	NA	0	in situ	belly	SE	ground_W	bent	bent	right knee	face	asymmetry leg-head	bent	bent	separated	1	0	0		0	0	0	0	0	0
735	IIIA2	IIIe	32.57956088	25.23027705	S	?	0	6_8	5_10	0	0	1	0	0	0	0	0	Simple pit	nothing	NA	?	NA	NA	NA	NA	NA	0	in situ	left	SE	ground	bent	bent	left elbow	face	asymmetry head-thorax	bent	bent	joined	1	0	0		0	0	0	0	0	0
733	IIIA2	IIIe	32.57953809	25.23028365	S	?	0	6-9 m	0-1	1	0	0	0	0	0	0	0	Simple pit	nothing	NA	?	NA	NA	NA	NA	NA	0	in situ	left	S	ground_W	bent	bent	left elbow	face	asymmetry head-thorax	bent	bent	joined	1	0	0		0	0	0	0	0	0
716	IID-IIIA1	IIt	32.57978006	25.22964477	S	?	0	6-9 m	0-1	1	0	0	0	0	0	0	0	Simple pit	nothing	NA	?	NA	NA	NA	NA	NA	0	in situ	left	SE	W	in extension	bent	pelvis	thorax	asymmetry leg-thorax	bent	bent	joined	1	0	0		0	0	0	0	0	0
821	IIIA1-A2	IIIe	32.57966805	25.22982134	S	?	0	12-18 m	1_5	0	1	0	0	0	0	0	0	Simple pit	nothing	Simple pit	?	NA	NA	NA	NA	NA	0	hypercontraction	left	SE	ground	bent	bent	leg	left knee	symmetry leg	bent	bent	joined	1	0	0		0	0	0	0	0	0
452	IIID/3e dyn	3edyn	32.57944561	25.23045675	N	F	1	>19 + foetus	>19 + foetus	1	0	0	0	0	1	0	1	Simple pit	nothing	NA	?	NA	NA	NA	NA	NA	0	hypercontraction	left	S	W	bent	bent	face	face	symmetry head	hyper-bent	hyper-bent	joined	1	0	0		0	0	0	0	0	0
940	IIID/3e dyn	3edyn	32.57937332	25.23052793	N	?	1	>19	>19	0	0	0	0	0	1	0	1	Simple pit	nothing	NA	?	NA	NA	NA	NA	NA	0	hypercontraction	right	W	SE	hyper-bent	hyper-bent	neck	neck	symmetry head	hyper-bent	hyper-bent	joined	1	0	0		0	0	0	0	0	0
635	IIIA1-A2	IIIe	32.57955533	25.22999196	S	?	0	6_7	5_10	0	0	1	0	0	0	0	0	Simple pit	wrap in mat	NA	?	NA	NA	NA	NA	NA	0	hypercontraction	belly	SE	ground	bent	bent	thorax	thorax	symmetry thorax	hyper-bent	hyper-bent	joined	1	0	0		0	0	0	0	0	0
764	IIIA1-A2	IIIe	32.57962076	25.23025007	S	?	0	12-18 m	1_5	0	1	0	0	0	0	0	0	Simple pit	nothing	Simple pit	?	NA	NA	NA	NA	NA	0	NA	seated	W	N	NA	NA	NA	NA	NA	NA	NA	NA	1	0	0		0	0	0	0	0	0
159	IIID/3e dyn	3edyn	32.57944871	25.23062038	N	?	0	6-12 m	0-1	1	0	0	0	0	0	0	0	Jar	nothing	Jar	?	NA	NA	NA	NA	NA	0	NA	NA	?	ground	bent	bent	?	?	?	hyper-bent	hyper-bent	NA	1	0	0		0	0	0	0	0	0
930	IIID/3e dyn	3edyn	32.57940101	25.23069505	N	?	0	13-15	12_15	0	0	0	1	0	0	0	1	Simple pit	nothing	NA	?	NA	NA	NA	NA	NA	4	NA	right	?	NA	bent	NA	right pelvis	NA	?	NA	NA	NA	1	0	0		0	0	0	0	0	0
579	IID-IIIA1	IIt	32.57956219	25.22969691	S	?	0	3_4	1_5	0	1	0	0	0	0	0	0	Simple pit	nothing	Simple pit	?	NA	NA	NA	NA	NA	0	in situ	left	SE	W	in extension	bent	left knee	face	asymmetry leg-head	bent	bent	close	1	0	0		0	0	0	0	0	0
497	IIIA1-A2	IIIe	32.57951082	25.23021308	S	?	0	0_1	0-1	1	0	0	0	0	0	0	0	Simple pit	nothing	NA	?	NA	NA	NA	NA	NA	0	in situ	left	SE	NW	bent	bent	face	face	symmetry head	bent	bent	close	1	0	0		0	0	0	0	0	0
571	IIIA1-A2	IIIe	32.57953392	25.22979754	S	?	0	2	1_5	0	1	0	0	0	0	0	0	Simple pit	nothing	Simple pit	?	NA	NA	NA	NA	NA	0	in situ	left	SE	W	bent	bent	face	face	symmetry head	bent	bent	close	1	0	0		0	0	0	0	0	0
563	IIIA2	IIIe	32.579479	25.23015152	S	?	0	newborn	0-1	1	0	0	0	0	0	0	0	Jar	nothing	Jar	?	NA	NA	NA	NA	NA	0	in situ	left	SW	ground	bent	bent	abdomen	Abdomen	symmetry thorax	bent	bent	close	1	0	0		0	0	0	0	0	0
661	?	NA	32.57950406	25.22977525	S	?	0	6_7	5_10	0	0	1	0	0	0	0	0	Simple pit	nothing	NA	?	NA	NA	NA	NA	NA	0	in situ	left	S	SW	bent	bent	thorax	right knee	asymmetry leg-thorax	bent	bent	close	1	0	0		0	0	0	0	0	0
964	IIID/3e dyn	3edyn	32.57954674	25.23083686	N	?	0	newborn	0-1	1	0	0	0	0	0	0	0	Jar	nothing	Jar	?	NA	NA	NA	NA	NA	0	NA	belly	SW	ground	bent	bent	abdomen	leg	asymmetry leg-thorax	bent	bent	close	1	0	0		0	0	0	0	0	0
743	IIIA1-A2	IIIe	32.5795668	25.23034918	S	?	0	6-18 m	0-1	1	0	0	0	0	0	0	0	Simple pit	nothing	NA	?	NA	NA	NA	NA	NA	0	hypercontraction	left	SE	W	bent	bent	face	face	symmetry head	bent	bent	close	1	0	0		0	0	0	0	0	0
780	IIIA1-A2	IIIe	32.57962435	25.23038342	S	?	0	3	1_5	0	1	0	0	0	0	0	0	Simple pit	wrap in mat	Simple pit Wrapped	?	NA	NA	NA	NA	NA	0	hypercontraction	left	SE	ground	bent	bent	head	head	symmetry head	bent	bent	close	1	0	0		0	0	0	0	0	0
742	IIIA1-A2	IIIe	32.57957033	25.23036393	S	?	0	3-6 m	0-1	1	0	0	0	0	0	0	0	Simple pit	nothing	NA	?	NA	NA	NA	NA	NA	0	in situ	left	SE	SW	bent	bent	pelvis	thorax	symmetry thorax	bent	bent	close	1	0	0		0	0	0	0	0	0
801	IIIA2-IIIC	IIIm	32.5796009	25.23041457	S	?	0	9-12 m	0-1	1	0	0	0	0	0	0	0	Simple pit	nothing	NA	?	NA	NA	NA	NA	NA	0	in situ	left	SE	ground_W	in extension	in extension	thorax	thorax	symmetry thorax	bent	bent	close	1	0	0		0	0	0	0	0	0
952	IIID/3e dyn	3edyn	32.57939145	25.23074865	N	?	0	6	5_10	0	0	1	0	0	0	0	0	Simple pit	nothing	NA	?	NA	NA	NA	NA	NA	0	hypercontraction	right	SW	NA	bent	NA	face	head	symmetry head	hyper-bent	hyper-bent	close	1	0	0		0	0	0	0	0	0
727	IIIA1-A2	IIIe	32.57949919	25.23026413	S	?	0	newborn	0-1	1	0	0	0	0	0	0	0	Jar	nothing	Jar	?	NA	NA	NA	NA	NA	0	in situ	belly	SE	?	bent	in extension	left shoulder	face	asymmetry head-thorax	bent	bent	crossed	2	0	0		0	0	0	0	0	0
954	IIID/3e dyn	3edyn	32.57939713	25.23080419	N	?	0	15-18	15-19	0	0	0	0	1	0	0	1	Simple pit	nothing	NA	?	NA	NA	NA	NA	NA	0	hypercontraction	right	NW	W	bent	bent	thorax	thorax	symmetry thorax	hyper-bent	hyper-bent	crossed	2	0	0		0	0	0	0	0	0
767	?	NA	32.57965996	25.23019629	S	?	0	18 m	1_5	0	1	0	0	0	0	0	0	Jar	nothing	Jar	?	NA	NA	NA	NA	NA	0	brought in jar	left	S	ground	in extension	in extension	?	?	?	bent	in extension	separated	2	0	0		0	0	0	0	0	0
623	IIC-IID	IIt	32.57973577	25.22969694	S	?	0	3-6 m	0-1	1	0	0	0	0	0	0	0	Jar	nothing	Jar	?	NA	NA	NA	NA	NA	0	in situ	right	SE	NE	in extension	in extension	knee	knee	symmetry leg	bent	bent	separated	2	0	0		0	0	0	0	0	0
648	IIIA1-A2	IIIe	32.57953582	25.23013642	S	?	0	2_4	1_5	0	1	0	0	0	0	0	0	Jar	nothing	Jar	?	NA	NA	NA	NA	NA	0	in situ	right	NW	SW	bent	bent	thorax	thorax	symmetry thorax	bent	bent	separated	2	0	0		0	0	0	0	0	0
718	IIIA2	IIIe	32.57948522	25.2303139	S	?	0	newborn-3 m	0-1	1	0	0	0	0	0	0	0	Jar	nothing	Jar	?	NA	NA	NA	NA	NA	3	in situ	back	E	?	in extension	in extension	thorax	thorax	symmetry thorax	bent	bent	separated	2	0	0		0	0	0	0	0	0
901	3e dyn	3edyn	32.57955848	25.23074562	N	?	0	2_3	1_5	0	1	0	0	0	0	0	0	Jar	nothing	Jar	?	NA	NA	NA	NA	NA	0	hypercontraction	belly	SW	ground	bent	bent	Abdomen	Abdomen	symmetry thorax	hyper-bent	hyper-bent	separated	2	0	0		0	0	0	0	0	0
845	IIID/3e dyn	3edyn	32.57950714	25.23065097	N	?	0	10_11	10_12	0	0	0	1	0	0	1	0	Jar	nothing	Jar	?	NA	NA	NA	NA	NA	0	in situ	seated	W	ground	bent	bent	face	thorax	asymmetry head-thorax	bent	bent	joined	2	0	0		0	0	0	0	0	0
987	3e dyn	3edyn	32.57951382	25.23089062	N	?	0	5_6	5_10	0	0	1	0	0	0	0	0	Simple pit	basket under jar	in pit under jar	?	NA	NA	NA	NA	NA	0	hypercontraction	right	N	ground	in extension	bent	leg	face	asymmetry leg-head	bent	bent	joined	2	0	0		0	0	0	0	0	0
859	IIID/3e dyn	3edyn	32.57941875	25.23069245	N	?	0	4	1_5	0	1	0	0	0	0	0	0	Jar	nothing	Jar	?	NA	NA	NA	NA	NA	0	in situ	right	W	NE	bent	bent	face	head	symmetry head	bent	bent	joined	2	0	0		0	0	0	0	0	0
517	IIIA1-A2	IIIe	32.57941683	25.2301631	S	?	0	0_1	0-1	1	0	0	0	0	0	0	0	Jar	nothing	Jar	?	NA	NA	NA	NA	NA	0	in situ	left	SE	W	bent	bent	face	face	symmetry head	bent	bent	joined	2	0	0		0	0	0	0	0	0
723	IIIA2	IIIe	32.57945923	25.23029398	S	?	0	4_6	1_5	0	1	0	0	0	0	0	0	Simple pit	nothing	Simple pit	?	NA	NA	NA	NA	NA	0	in situ	left	SE	W	bent	bent	face	chin	symmetry head	bent	bent	joined	2	0	0		0	0	0	0	0	0
917	IIID/3e dyn	3edyn	32.57952831	25.23091592	N	M	1	40-45	>19	0	0	0	0	0	1	0	1	Simple pit	nothing	NA	?	NA	NA	NA	NA	NA	0	hypercontraction	left	NW	ground	bent	bent	face	face	symmetry head	hyper-bent	hyper-bent	joined	2	0	0		0	0	0	0	0	0
706	IID-IIIA1	IIt	32.57978148	25.2296073	S	?	0	newborn-3 m	0-1	1	0	0	0	0	0	0	0	Jar	nothing	Jar	?	NA	NA	NA	NA	NA	0	in situ	back	NW	NE	bent	bent	thorax	pelvis	asymmetry leg-thorax	slightly bent	slightly bent	joined	2	0	0		0	0	0	0	0	0
564	IIIA1-A2	IIIe	32.57948099	25.23016909	S	?	0	6-12 m	0-1	1	0	0	0	0	0	0	0	Jar	nothing	Jar	?	NA	NA	NA	NA	NA	0	brought in jar	left	S	W	bent	in extension	left forearm	left hip	asymmetry leg-thorax	NA	NA	NA	2	0	0		0	0	0	0	0	0
972	IIIA1	IIIe	32.57955363	25.23021113	S	?	0	12-18 m	1_5	0	1	0	0	0	0	0	0	Jar	nothing	Jar	?	NA	NA	NA	NA	NA	3	in situ	left	S	NW	slightly bent	NA	NA	NA	NA	NA	NA	NA	2	0	0		0	0	0	0	0	0
411	3e dyn	3edyn	32.57950403	25.23057202	N	?	0	0 +/- 3 m	0-1	1	0	0	0	0	0	0	0	Jar	nothing	Jar	?	NA	NA	NA	NA	NA	5	NA	NA	S	?	NA	NA	NA	NA	NA	NA	NA	NA	2	0	0		0	0	0	0	0	0
872_B	IIID/3e dyn	3edyn	32.57948843	25.23077413	N	?	0	5_6	5_10	0	0	1	0	0	0	0	0	Jar	nothing	Jar	?	NA	NA	NA	NA	NA	0	in situ	NA	NA	NA	NA	NA	NA	NA	NA	NA	NA	NA	2	0	0		0	0	0	0	0	0
872_A	IIID/3e dyn	3edyn	32.57948843	25.23077413	N	?	0	5_6	5_10	0	0	1	0	0	0	0	0	Jar	nothing	Jar	?	NA	NA	NA	NA	NA	0	in situ	NA	NA	NA	NA	NA	NA	NA	NA	NA	NA	NA	2	0	0		0	0	0	0	0	0
862	3e dyn	3edyn	32.57944908	25.23069976	N	M	1	>19	>19	0	0	0	0	0	1	0	1	Simple pit	nothing	NA	?	NA	NA	NA	NA	NA	4	NA	back	W	NA	bent	bent	abdomen	pelvis	symmetry thorax	NA	NA	NA	2	0	0		0	0	0	0	0	0
721	IIIA1-A2	IIIe	32.57955231	25.23032572	S	?	0	6 m	0-1	1	0	0	0	0	0	0	0	Jar	nothing	Jar	?	NA	NA	NA	NA	NA	0	in situ	belly	SE	E	bent	bent	face	face	symmetry head	bent	bent	close	2	0	0		0	0	0	0	0	0
627	IIIA1	IIIe	32.57983997	25.2297234	S	?	0	6 m	0-1	1	0	0	0	0	0	0	0	Jar	nothing	Jar	?	NA	NA	NA	NA	NA	0	in situ	right	S	ground	bent	bent	face	face	symmetry head	bent	bent	close	2	0	0		0	0	0	0	0	0
726	IIIA1-A2	IIIe	32.57948978	25.23027431	S	?	0	2	1_5	0	1	0	0	0	0	0	0	Jar	wrap in mat	Jar	?	NA	NA	NA	NA	NA	0	hypercontraction	back	SE	?	bent	NA	head	head	symmetry head	bent	bent	close	2	0	0		0	0	0	0	0	0
665	IIIA1	IIIe	32.5796207	25.22962985	S	?	0	12-16 m	1_5	0	1	0	0	0	0	0	0	Jar	wrap in mat	Jar	?	NA	NA	NA	NA	NA	0	hypercontraction	back	SE	ground	bent	bent	foot	left hip	symmetry leg	bent	bent	close	2	0	0		0	0	0	0	0	0
878	IIID/3e dyn	3edyn	32.57953874	25.2308127	N	?	0	6_7	5_10	0	0	1	0	0	0	0	0	Coffin	wrap in mat	NA	?	mud	NA	NA	NA	NA	0	hypercontraction	belly	W	SW	bent	bent	head	left knee	asymmetry leg-head	hyper-bent	hyper-bent	crossed	3	0	0		0	0	0	0	0	0
513	IIIA1-A2	IIIe	32.57951826	25.23020807	S	?	0	0_1	0-1	1	0	0	0	0	0	0	0	Jar	nothing	Jar	?	NA	NA	NA	NA	NA	0	brought in jar	belly	N	ground	in extension	hyper-bent	pelvis	face	asymmetry head-thorax	bent	bent	separated	3	0	0		0	0	0	0	0	0
853	IIID/3e dyn	3edyn	32.57940855	25.23066145	N	?	0	newborn-6 m	0-1	1	0	0	0	0	0	0	0	Jar	nothing	Jar	?	NA	NA	NA	NA	NA	0	hypercontraction	left	SE	SW	bent	bent	right leg	Abdomen	asymmetry leg-thorax	bent	bent	separated	3	0	0		0	0	0	0	0	0
799	IIIA2	IIIe	32.57965657	25.23027385	S	?	0	6 m	0-1	1	0	0	0	0	0	0	0	Jar	nothing	Jar	?	NA	NA	NA	NA	NA	0	in situ	back	W	ground	bent	bent	thorax	left knee	asymmetry leg-thorax	bent	bent	separated	3	0	0		0	0	0	0	0	0
151	IIID/3e dyn	3edyn	32.57949214	25.23061313	N	?	0	0-6 m	0-1	1	0	0	0	0	0	0	0	Coffin	nothing	NA	?	mud	NA	NA	NA	NA	0	in situ	right	NA	ground	in extension	in extension	head	face	symmetry head	bent	bent	separated	3	0	0		0	0	0	0	0	0
628	IID-IIIA1	IIt	32.57983051	25.22972978	S	?	0	6-9 m	0-1	1	0	0	0	0	0	0	0	Jar	nothing	Jar	?	NA	NA	NA	NA	NA	0	in situ	left	W	ground	bent	bent	thorax	thorax	symmetry thorax	bent	bent	joined	3	0	0		0	0	0	0	0	0
973	IIIA1-A2	IIIe	32.57954377	25.23025196	S	?	0	3	1_5	0	1	0	0	0	0	0	0	Jar	nothing	Jar	?	NA	NA	NA	NA	NA	0	hypercontraction	left	SE	W	bent	bent	face	face	symmetry head	hyper-bent	hyper-bent	NA	3	0	0		0	0	0	0	0	0
982	IIID/3e dyn	3edyn	32.57953621	25.23084021	N	?	0	9-12 m	0-1	1	0	0	0	0	0	0	0	Jar	nothing	Jar	?	NA	NA	NA	NA	NA	0	hypercontraction	belly	SW	E	NA	NA	NA	NA	NA	NA	NA	NA	3	0	0		0	0	0	0	0	0
152	IIID/3e dyn	3edyn	32.57947633	25.2306234	N	?	0	1_2	1_5	0	1	0	0	0	0	0	0	Jar	nothing	Jar	?	NA	NA	NA	NA	NA	0	NA	back	NA	?	NA	NA	NA	NA	NA	NA	NA	NA	3	0	0		0	0	0	0	0	0
896	3e dyn	3edyn	32.57953655	25.23086222	N	?	0	0-6 m	0-1	1	0	0	0	0	0	0	0	Jar	nothing	Jar	?	NA	NA	NA	NA	NA	0	NA	vertical	W	NA	NA	NA	NA	NA	NA	NA	NA	NA	3	0	0		0	0	0	0	0	0
418	3e dyn	3edyn	32.57950054	25.23056108	N	?	0	12_18	15-19	0	0	0	0	1	0	0	1	Simple pit	nothing	in pit under jar	?	NA	NA	NA	NA	NA	0	NA	NA	?	NA	NA	NA	NA	NA	NA	NA	NA	NA	3	0	0		0	0	0	0	0	0
857	IIID/3e dyn	3edyn	32.57940261	25.23067754	N	?	0	18-24 m	1_5	0	1	0	0	0	0	0	0	Coffin	nothing	Coffin	?	mud	0.55	0.39	NA	0.03	0	in situ	left	SE	W	bent	NA	head	head	symmetry head	bent	bent	close	3	0	0		0	0	0	0	0	0
728	IIIA1-A2	IIIe	32.57949758	25.23025904	S	?	0	3-6 m	0-1	1	0	0	0	0	0	0	0	Jar	wrap in mat	Jar	?	NA	NA	NA	NA	NA	0	in situ	left	SE	ground	bent	bent	abdomen	Abdomen	symmetry thorax	bent	bent	separated	4	0	0		0	0	0	0	0	0
659	IIIA1	IIIe	32.57951192	25.22979493	S	?	0	newborn-3 m	0-1	1	0	0	0	0	0	0	0	Jar	nothing	Jar	?	NA	NA	NA	NA	NA	0	in situ	left	SE	SW	bent	bent	right hip	left knee	asymmetry leg-thorax	bent	bent	joined	4	0	0		0	0	0	0	0	0
651	IIIA1-A2	IIIe	32.57949476	25.23016706	S	?	0	6 m	0-1	1	0	0	0	0	0	0	0	Simple pit	covered by a jar	in pit under jar	?	NA	NA	NA	NA	NA	0	hypercontraction	right	NW	SE	bent	bent	thorax	thorax	symmetry thorax	bent	bent	NA	2	0	0		0	0	0	0	0	0
446	IIID/3e dyn	3edyn	32.57948674	25.23045678	N	?	0	0_1	0-1	1	0	0	0	0	0	0	0	Simple pit	covered by a jar	in pit under jar	?	NA	NA	NA	NA	NA	0	NA	left	E	NE	bent	bent	knee	knee	symmetry leg	hyper-bent	hyper-bent	close	3	0	0		0	0	0	0	0	0
939	IIID/3e dyn	3edyn	32.57938102	25.23053156	N	?	0	3-6 m	0-1	1	0	0	0	0	0	0	0	Simple pit	covered by a jar	in pit under jar	?	NA	NA	NA	NA	NA	0	in situ	right	NE	W	bent	bent	face	Abdomen	asymmetry head-thorax	bent	bent	separated	2	0	0		0	0	0	0	0	0
614	?	NA	32.57946064	25.22993393	S	?	0	9-12 m	0-1	1	0	0	0	0	0	0	0	Simple pit	covered by a jar	in pit under jar	?	NA	NA	NA	NA	NA	0	NA	right	NW	SW	in extension	bent	face	face	symmetry head	bent	bent	separated	2	0	0		0	0	0	0	0	0
911	IIID/3e dyn	3edyn	32.57940633	25.23043234	N	?	0	newborn	0-1	1	0	0	0	0	0	0	0	Simple pit	covered by a jar	in pit under jar	?	NA	NA	NA	NA	NA	0	NA	left	E	E	in extension	slightly bent	right knee	Abdomen	asymmetry leg-thorax	bent	bent	joined	2	0	0		0	0	0	0	0	0
396	IIID/3e dyn	3edyn	32.57944447	25.2305713	N	?	0	newborn-6 m	0-1	1	0	0	0	0	0	0	0	Simple pit	covered by a jar	in pit under jar	?	NA	NA	NA	NA	NA	0	in situ	seated	NA	E	bent	bent	face	head	symmetry head	hyper-bent	hyper-bent	NA	2	0	0		0	0	0	0	0	0
442	IIID/3e dyn	3edyn	32.57943587	25.23058693	N	?	0	0_1	0-1	1	0	0	0	0	0	0	0	Simple pit	covered by a jar	in pit under jar	?	NA	NA	NA	NA	NA	0	NA	back	E	S	bent	bent	abdomen	Abdomen	symmetry thorax	hyper-bent	hyper-bent	NA	2	0	0		0	0	0	0	0	0
875	3e dyn	3edyn	32.57956098	25.2308255	N	?	0	foetus-newborn	0-1	1	0	0	0	0	0	0	0	Simple pit	covered by a jar	in pit under jar	?	NA	NA	NA	NA	NA	0	hypercontraction	right	NW	W	slightly bent	in extension	right leg	leg	symmetry leg	bent	bent	separated	3	0	0		0	0	0	0	0	0
732	IIIA2-IIIC	IIIm	32.57954163	25.230263	S	?	0	18-24 m	1_5	0	1	0	0	0	0	0	0	Jar	nothing	Jar	?	NA	NA	NA	NA	NA	0	in situ	right	W	ground	bent	bent	chin	face	symmetry head	bent	bent	joined	2	0	0		0	0	0	0	0	0
854	IIID/3e dyn	3edyn	32.57940366	25.2306623	N	?	0	6-9 m	0-1	1	0	0	0	0	0	0	0	Simple pit	covered by frgmt of offerings	NA	?	NA	NA	NA	NA	NA	0	in situ	left	N	E	bent	in extension	face	right knee	asymmetry head-thorax	bent	bent	separated	2	0	0		0	0	0	0	0	0
888	3e dyn	3edyn	32.57948015	25.23083196	N	?	0	10_11	10_12	0	0	0	1	0	0	1	0	Simple pit	wrap in mat	NA	?	NA	NA	NA	NA	NA	0	hypercontraction	belly	N	ground	bent	bent	thorax	face	asymmetry head-thorax	hyper-bent	hyper-bent	separated	1	0	0		0	0	0	0	0	0
882	3e dyn	3edyn	32.57948725	25.23081133	N	?	0	15-19	15-19	0	0	0	0	1	0	0	1	Simple pit	wrap in mat	NA	?	NA	NA	NA	NA	NA	0	hypercontraction	left	N	W	bent	bent	right leg	right elbow	asymmetry leg-thorax	hyper-bent	hyper-bent	joined	1	0	0		0	0	0	0	0	0
724	IIIA1-A2	IIIe	32.57947005	25.23026196	S	?	0	3 m	0-1	1	0	0	0	0	0	0	0	Simple pit	wrap in mat	NA	?	NA	NA	NA	NA	NA	0	in situ	left	SE	NW	in extension	bent	knee	face	asymmetry leg-head	bent	bent	separated	2	0	0		0	0	0	0	0	0
773	IIIA1-A2	IIIe	32.57963083	25.23026541	S	?	0	4	1_5	0	1	0	0	0	0	0	0	Simple pit	wrap in mat	Simple pit Wrapped	?	NA	NA	NA	NA	NA	0	in situ	left	SE	ground_W	bent	bent	face	face	symmetry head	bent	bent	separated	1	0	0		0	0	0	0	0	0
642	IIIA2-IIIC	IIIm	32.57956697	25.230136	S	?	0	2-2.5	1_5	0	1	0	0	0	0	0	0	Simple pit	wrap in mat	Simple pit Wrapped	?	NA	NA	NA	NA	NA	0	NA	left	SE	ground	bent	in extension	left forearm	leg	asymmetry leg-thorax	bent	bent	joined	1	0	0		0	0	0	0	0	0
158	IIID/3e dyn	3edyn	32.5794629	25.23063158	N	?	0	3_4	1_5	0	1	0	0	0	0	0	0	Jar	wrap in mat	Jar	?	NA	NA	NA	NA	NA	5	NA	left	?	W	bent	bent	NA	NA	NA	bent	bent	NA	1	0	0		0	0	0	0	0	0
163	IIID/3e dyn	3edyn	32.57944471	25.23057727	N	?	0	3_5	1_5	0	1	0	0	0	0	0	0	Simple pit	wrap in mat	Simple pit Wrapped	?	NA	NA	NA	NA	NA	0	in situ	right	NA	S	bent	bent	leg	leg	symmetry leg	bent	bent	NA	1	0	0		0	0	0	0	0	0
840	IIID/3e dyn	3edyn	32.57946914	25.23061345	N	?	0	8	5_10	0	0	1	0	0	0	0	0	Simple pit	wrap in mat	NA	?	NA	NA	NA	NA	NA	0	hypercontraction	right	NW	ground	bent	bent	face	head	symmetry head	hyper-bent	hyper-bent	close	1	0	0		0	0	0	0	0	0
734	IIIA2	IIIe	32.5795525	25.23027793	S	?	0	6-9 m	0-1	1	0	0	0	0	0	0	0	Simple pit	wrap in mat	NA	?	NA	NA	NA	NA	NA	0	in situ	left	W	N	in extension	bent	knee	left leg	symmetry leg	bent	bent	separated	2	0	0		0	0	0	0	0	0
600_B	IIIA1-A2	IIIe	32.57962239	25.22976959	S	?	0	24 m	1_5	0	1	0	0	0	0	0	0	Simple pit	wrap in mat	Simple pit Wrapped	?	NA	NA	NA	NA	NA	2	in situ	left	E	SE	bent	in extension	abdomen	knee	symmetry leg	bent	bent	separated	2	0	0		0	0	0	0	0	0
921	3e dyn	3edyn	32.57955691	25.2307352	N	?	0	3_4	1_5	0	1	0	0	0	0	0	0	Simple pit	wrap in mat	Simple pit Wrapped	?	NA	NA	NA	NA	NA	0	hypercontraction	back	E	sky	bent	bent	right shoulder	neck	asymmetry head-thorax	hyper-bent	hyper-bent	separated	2	0	0		0	0	0	0	0	0
905	IIID	IIIt	32.57944886	25.23053605	N	?	0	7	5_10	0	0	1	0	0	0	0	0	Simple pit	wrap in mat	NA	?	NA	NA	NA	NA	NA	0	hypercontraction	right	SE	N	bent	bent	face	face	symmetry head	hyper-bent	hyper-bent	separated	2	0	0		0	0	0	0	0	0
910	?	NA	32.57942149	25.23047579	N	M	0	15-18	15-19	0	0	0	0	1	0	0	1	Simple pit	wrap in mat	NA	?	NA	NA	NA	NA	NA	0	hypercontraction	left	S	ground	bent	bent	knee	Abdomen	asymmetry leg-thorax	hyper-bent	hyper-bent	joined	2	0	0		0	0	0	0	0	0
600_A	IIIA1-A2	IIIe	32.57962239	25.22976959	S	?	0	5_6	5_10	0	0	1	0	0	0	0	0	Simple pit	wrap in mat	NA	?	NA	NA	NA	NA	NA	2	in situ	left	E	SE	bent	bent	knee	knee	symmetry leg	hyper-bent	hyper-bent	joined	2	0	0		0	0	0	0	0	0
863	3e dyn	3edyn	32.57944839	25.230691	N	F	1	>19	>19	0	0	0	0	0	1	0	1	Simple pit	wrap in mat	NA	?	NA	NA	NA	NA	NA	4	hypercontraction	right	N	NA	bent	bent	NA	NA	NA	hyper-bent	NA	NA	2	0	0		0	0	0	0	0	0
722	IIIA2	IIIe	32.57952581	25.2303399	S	?	0	2_3	1_5	0	1	0	0	0	0	0	0	Simple pit	wrap in mat	Simple pit Wrapped	?	NA	NA	NA	NA	NA	0	hypercontraction	left	SE	W	bent	bent	face	face	symmetry head	bent	bent	close	2	0	0		0	0	0	0	0	0
908	IIIA2-IIID	IIIm	32.57941756	25.23052607	N	?	0	newborn	0-1	1	0	0	0	0	0	0	0	Simple pit	basket	NA	?	NA	NA	NA	NA	NA	0	hypercontraction	right	W	NE	bent	bent	knee	head	asymmetry leg-head	bent	bent	separated	2	0	0		0	0	0	0	0	0
555	?	NA	32.57950106	25.2299791	S	?	0	6 m	0-1	1	0	0	0	0	0	0	0	Simple pit	basket	NA	?	NA	NA	NA	NA	NA	0	hypercontraction	left	W	ground	bent	bent	face	face	symmetry head	bent	bent	joined	2	0	0		0	0	0	0	0	0
926	IIID/3e dyn	3edyn	32.579405	25.23073394	N	?	0	12-18 m	1_5	0	1	0	0	0	0	0	0	Simple pit	basket	Simple pit in Basket	?	NA	NA	NA	NA	NA	0	NA	left	SW	ground	NA	bent	thorax	head	asymmetry head-thorax	bent	bent	NA	3	0	0		0	0	0	0	0	0
565	IIIA2	IIIe	32.5795276	25.23001397	S	?	0	3	1_5	0	1	0	0	0	0	0	0	Simple pit	wrap in mat	Simple pit Wrapped	?	NA	NA	NA	NA	NA	0	in situ	left	SE	W	bent	bent	chin	head	symmetry head	bent	bent	joined	2	0	0		0	0	0	0	0	0
652	IIIA2	IIIe	32.57948979	25.23015387	S	?	0	5	1_5	0	1	0	0	0	0	0	0	Simple pit	basket	Simple pit in Basket	?	NA	NA	NA	NA	NA	0	in situ	left	S	ground_W	bent	bent	face	face	symmetry head	bent	bent	close	1	0	0		0	0	0	0	0	0
842	IIID/3e dyn	3edyn	32.57943805	25.23064264	N	?	0	3-6 m	0-1	1	0	0	0	0	0	0	0	Jar	wrap in mat	Jar	?	NA	NA	NA	NA	NA	0	NA	seated	back north	SW	bent	bent	face	left hip	asymmetry leg-head	bent	bent	separated	2	0	0		0	0	0	0	0	0
737	IIIA2	IIIe	32.57955195	25.23030445	S	?	0	6-9 m	0-1	1	0	0	0	0	0	0	0	Simple pit	wrap in mat	NA	?	NA	NA	NA	NA	NA	3	in situ	back	S	W	slightly bent	in extension	thorax	thorax	symmetry thorax	in extension	in extension	close	2	0	0		0	0	0	0	0	0
877	3e dyn	3edyn	32.57955397	25.23081981	N	?	0	2.5-3	1_5	0	1	0	0	0	0	0	0	Jar	wrap in mat	Jar	?	NA	NA	NA	NA	NA	0	NA	left	SE	ground	bent	bent	Abdomen	Abdomen	symmetry thorax	bent	bent	joined	3	0	0		0	0	0	0	0	0
646	IIIA2	IIIe	32.57951516	25.2301777	S	?	0	6 m	0-1	1	0	0	0	0	0	0	0	Jar	wrap in mat	Jar	?	NA	NA	NA	NA	NA	0	NA	left	E	ground	bent	bent	chin	chin	symmetry head	bent	bent	separated	2	0	0		0	0	0	0	0	0
522	IIC-IIIA1	IIt	32.5795105	25.2300752	S	?	0	2_3	1_5	0	1	0	0	0	0	0	0	Jar	wrap in mat	Jar	?	NA	NA	NA	NA	NA	0	brought in jar	right	SE	NE	in extension	bent	left knee	right knee	symmetry leg	bent	bent	joined	3	0	0		0	0	0	0	0	0
534	IIIA2	IIIe	32.57943451	25.23014968	S	?	0	5_7	5_10	0	0	1	0	0	0	0	0	Simple pit	wrap in mat	NA	?	NA	NA	NA	NA	NA	3	hypercontraction	left	E	S	hyper-bent	hyper-bent	chin	chin	symmetry head	hyper-bent	hyper-bent	joined	2	0	0		0	0	0	0	0	0
509	IID-IIIA2	IIt	32.57952208	25.23018605	S	?	0	0_1	0-1	1	0	0	0	0	0	0	0	Jar	wrap in mat	Jar	?	NA	NA	NA	NA	NA	0	brought in jar	back	SE	S	bent	bent	knee	pelvis	symmetry leg	bent	bent	joined	3	0	0		0	0	0	0	0	0
757	IIIA1-A2	IIIe	32.57960416	25.23020983	S	?	0	12-18 m	1_5	0	1	0	0	0	0	0	0	Simple pit	wrap ?	Simple pit Wrapped	?	NA	NA	NA	NA	NA	0	in situ	left	SE	NW	in extension	in extension	right hip	left hip	symmetry leg	in extension	in extension	close	1	0	0		0	0	0	0	0	0
968	IIIA1-A2	IIIe	32.57956534	25.23018507	S	?	0	12-18 m	1_5	0	1	0	0	0	0	0	0	Jar	wrap ?	Jar	?	NA	NA	NA	NA	NA	0	hypercontraction	back	S	SW	bent	NA	left arm	pelvis	symmetry thorax	hyper-bent	hyper-bent	close	3	0	0		0	0	0	0	0	0
167	IIID/3e dyn	3edyn	32.57943551	25.2305354	N	?	0	4_5	1_5	0	1	0	0	0	0	0	0	Simple pit	wrap under jar	in pit under jar	?	NA	NA	NA	NA	NA	1	NA	right	?	?	NA	NA	NA	NA	NA	NA	NA	NA	2	1	1		0	0	0	0	0	0
962	?	NA	32.57947364	25.23066513	N	?	0	newborn	0-1	1	0	0	0	0	0	0	0	Simple pit	wrap under jar	in pit under jar	?	NA	NA	NA	NA	NA	0	NA	left	NW	ground	bent	bent	face	face	symmetry head	bent	in extension	separated	2	0	0		0	0	0	0	0	0
958	IIID/3e dyn	3edyn	32.57955848	25.230838	N	?	0	newborn	0-1	1	0	0	0	0	0	0	0	Simple pit	wrap under jar	in pit under jar	?	NA	NA	NA	NA	NA	0	NA	left	N	S	bent	bent	right leg	leg	symmetry leg	bent	bent	joined	2	0	0		0	0	0	0	0	0
848	IIID/3e dyn	3edyn	32.57946147	25.23067073	N	?	0	newborn-6 m	0-1	1	0	0	0	0	0	0	0	Simple pit	wrap under jar	in pit under jar	?	NA	NA	NA	NA	NA	0	NA	left	SE	ground	bent	bent	thorax	Abdomen	symmetry thorax	bent	bent	joined	2	0	0		0	0	0	0	0	0
899	IIID/3e dyn	3edyn	32.57955598	25.23085097	N	?	0	0-6 m	0-1	1	0	0	0	0	0	0	0	Simple pit	wrap under jar	in pit under jar	?	NA	NA	NA	NA	NA	0	NA	left	W	NW	NA	NA	NA	NA	NA	NA	NA	NA	2	0	0		0	0	0	0	0	0
511	IIIA1-A2	IIIe	32.57950713	25.23005261	S	?	0	0_1	0-1	1	0	0	0	0	0	0	0	Simple pit	wrap under frgmt of jar	NA	?	NA	NA	NA	NA	NA	0	hypercontraction	right	W	ground_S	in extension	bent	right leg	neck	asymmetry leg-head	hyper-bent	hyper-bent	joined	2	0	0		0	0	0	0	0	0
457	IIID/3e dyn	3edyn	32.57948015	25.23070089	N	?	0	1_4	1_5	0	1	0	0	0	0	0	0	Simple pit	basket	Simple pit in Basket	0	NA	NA	NA	NA	NA	0	hypercontraction	back	SW	sky	in extension	in extension	right ankle	thorax	asymmetry leg-thorax	hyper-bent	hyper-bent	separated	3	0	0		0	0	0	0	0	0
520	IIC-IIIA1	IIt	32.57946848	25.23006977	S	?	0	8_12	5_10	0	0	1	0	0	0	0	0	Simple pit	wrap in mat	NA	?	NA	NA	NA	NA	NA	0	hypercontraction	left	SE	S	bent	bent	neck	neck	symmetry head	bent	bent	joined	3	0	0		0	0	0	0	0	0
521	IIIA1-A2	IIIe	32.57944198	25.23009373	S	?	0	6-12 m	0-1	1	0	0	0	0	0	0	0	Jar	wrap in mat	Jar	0	NA	NA	NA	NA	NA	0	hypercontraction	left	SE	W	hyper-bent	hyper-bent	left hand	left knee	asymmetry leg-thorax	bent	bent	joined	2	0	0		0	0	0	0	0	0
763	IIIA2	IIIe	32.57966976	25.23014912	S	?	0	2	1_5	0	1	0	0	0	0	0	0	Simple pit	wrap in mat	Simple pit Wrapped	?	NA	NA	NA	NA	NA	0	hypercontraction	left	SE	ground	bent	bent	face	face	symmetry head	bent	bent	separated	2	0	0		0	0	0	0	0	0
781	IIIA2-IIIC	IIIm	32.57960598	25.23041471	S	?	0	3-6 m	0-1	1	0	0	0	0	0	0	0	Simple pit	wrap in mat	NA	?	NA	NA	NA	NA	NA	0	in situ	left	S	NA	bent	bent	face	face	symmetry head	bent	bent	joined	2	0	0		0	0	0	0	0	0
827	IID	IIt	32.57975067	25.22975243	S	?	0	1	1_5	0	1	0	0	0	0	0	0	Simple pit	wrap in mat	Simple pit Wrapped	?	NA	NA	NA	NA	NA	0	in situ	left	SE	NW	bent	in extension	abdomen	left femur	asymmetry leg-thorax	bent	bent	close	1	0	0		0	0	0	0	0	0
755	IIIA1-A2	IIIe	32.5795967	25.23022725	S	?	0	2.5-3	1_5	0	1	0	0	0	0	0	0	Simple pit	wrap in mat	Simple pit Wrapped	?	NA	NA	NA	NA	NA	0	hypercontraction	right	SE	NE	bent	bent	neck	neck	symmetry head	hyper-bent	hyper-bent	separated	1	0	0		0	0	0	0	0	0
753	IIIA1-A2	IIIe	32.57960655	25.23023972	S	?	0	4_5	1_5	0	1	0	0	0	0	0	0	Simple pit	wrap in mat	Simple pit Wrapped	?	NA	NA	NA	NA	NA	0	hypercontraction	left	SW	ground	bent	bent	face	thorax	asymmetry head-thorax	bent	bent	separated	1	0	0		0	0	0	0	0	0
531	IIIA1	IIIe	32.57955496	25.22986725	S	?	0	6 m	0-1	1	0	0	0	0	0	0	0	Jar	wrap in mat	Jar	0	NA	NA	NA	NA	NA	0	hypercontraction	back	NE	W	in extension	bent	NA	NA	NA	hyper-bent	hyper-bent	joined	3	0	0		0	0	0	0	0	0
832	IIIA2	IIIe	32.57940675	25.23054992	N	?	0	1_4	1_5	0	1	0	0	0	0	0	0	Simple pit	wrap in mat	NA	?	NA	NA	NA	NA	NA	0	in situ	right	W	S	bent	bent	right shoulder	leg	asymmetry head-thorax	bent	bent	close	1	0	0		0	0	0	0	0	0
157	IIID/3e dyn	3edyn	32.57950861	25.23063478	N	F	1	>19	>19	0	0	0	0	0	1	0	1	Simple pit	wrap in mat	NA	?	NA	NA	NA	NA	NA	0	hypercontraction	right	?	N	hyper-bent	hyper-bent	thorax	leg	asymmetry leg-thorax	hyper-bent	hyper-bent	NA	1	0	0		0	0	0	0	0	0
731	IID-IIIA2	IIt	32.57950894	25.23028497	S	?	0	3_4	1_5	0	1	0	0	0	0	0	0	Simple pit	wrap in mat	Simple pit Wrapped	?	NA	NA	NA	NA	NA	0	hypercontraction	left	SE	W	bent	bent	face	face	symmetry head	bent	bent	separated	1	0	0		0	0	0	0	0	0
740	IIIA2-IIIC	IIIm	32.57954992	25.23040507	S	?	0	6-9 m	0-1	1	0	0	0	0	0	0	0	Simple pit	wrap in mat	NA	?	NA	NA	NA	NA	NA	0	in situ	belly	SE	E	in extension	bent	left elbow	neck	asymmetry head-thorax	in extension	hyper-bent	separated	1	0	0		0	0	0	0	0	0
983	IIID/3e dyn	3edyn	32.57949592	25.23089046	N	M	1	>30	>19	0	0	0	0	0	1	0	1	Coffin	wrap in mat	NA	0	mud	0.7	0.36	0.4	0.02	0	hypercontraction	back	NW	ground	bent	bent	chin	face	symmetry head	hyper-bent	hyper-bent	joined	3	0	0		0	0	0	0	0	0
768	?	NA	32.57965061	25.23020699	S	?	0	7_8	5_10	0	0	1	0	0	0	0	0	Simple pit	wrap in mat	NA	?	NA	NA	NA	NA	NA	0	hypercontraction	left	SE	NW	bent	bent	face	knee	asymmetry leg-head	bent	bent	close	1	0	0		0	0	0	0	0	0
738	IIIA1-A2	IIIe	32.57955546	25.2303224	S	?	0	12-18 m	1_5	0	1	0	0	0	0	0	0	Simple pit	wrap in mat	Simple pit Wrapped	?	NA	NA	NA	NA	NA	0	hypercontraction	left	S	N	bent	in extension	face	leg	asymmetry leg-head	bent	bent	close	2	0	0		0	0	0	0	0	0
398	IIID	IIIt	32.57942753	25.23050479	N	?	0	8_9	5_10	0	0	1	0	0	0	0	0	Simple pit	wrap in mat	NA	?	NA	NA	NA	NA	NA	0	hypercontraction	prone	SE	ground	hyper-bent	hyper-bent	face	face	symmetry head	hyper-bent	hyper-bent	joined	3	0	0		0	0	0	0	0	0
576	IIIA2	IIIe	32.57956486	25.22973202	S	?	0	3-6 m	0-1	1	0	0	0	0	0	0	0	Simple pit	nothing	NA	?	NA	NA	NA	NA	NA	2	NA	left	SE	?	slightly bent	slightly bent	left knee	face	asymmetry leg-head	bent	bent	separated	1	0	0		0	0	0	0	0	0
923	IIID/3e dyn	3edyn	32.57942769	25.23085832	N	?	0	6-12 m	0-1	1	0	0	0	0	0	0	0	Simple pit	?	NA	?	NA	NA	NA	NA	NA	4	NA	NA	NA	NA	NA	NA	NA	NA	NA	NA	NA	NA	NA	0	0		0	0	0	0	0	0
585	IIIA1	IIIe	32.57965835	25.22966804	S	?	0	3-6 m	0-1	1	0	0	0	0	0	0	0	Jar	nothing	Jar	?	NA	NA	NA	NA	NA	2	NA	NA	E	?	NA	NA	NA	NA	NA	NA	NA	NA	2	0	0		0	0	0	0	0	0
776	IIIC	IIIm	32.57961542	25.23033063	S	?	0	8_9	5_10	0	0	1	0	0	0	0	0	Simple pit	nothing	NA	?	NA	NA	NA	NA	NA	2	hypercontraction	left	SE	NA	NA	NA	NA	NA	NA	bent	bent	separated	1	0	0		0	0	0	0	0	0
547	IIIA1-A2	IIIe	32.57952231	25.22987555	S	?	0	7	5_10	0	0	1	0	0	0	0	0	Simple pit	nothing	NA	?	NA	NA	NA	NA	NA	3	NA	right	NW	sky_NE	in extension	in extension	NA	NA	NA	bent	bent	joined	1	0	0		0	0	0	0	0	0
518	IIIA2	IIIe	32.57943665	25.23005636	S	?	0	1_4	1_5	0	1	0	0	0	0	0	0	Simple pit	nothing	Simple pit	?	NA	NA	NA	NA	NA	1	in situ	left	E	SW	bent	slightly bent	face	knee	asymmetry leg-head	NA	NA	NA	1	0	0		0	0	0	0	0	0
449	IIIA2-IIIC	IIIm	32.57955612	25.23039827	S	?	0	0_1	0-1	1	0	0	0	0	0	0	0	Simple pit	nothing	NA	?	NA	NA	NA	NA	NA	1	NA	NA	S	?	NA	NA	NA	NA	NA	NA	NA	NA	1	0	0		0	0	0	0	0	0
779	IIIA2-IIID	IIIm	32.57960013	25.23036354	S	?	0	5_6	5_10	0	0	1	0	0	0	0	0	Simple pit	nothing	NA	?	NA	NA	NA	NA	NA	3	NA	left	SE	NA	NA	NA	NA	NA	NA	NA	NA	NA	1	0	0		0	0	0	0	0	0
670	IIIA1	IIIe	32.5796746	25.22965571	S	?	0	6-12m	0-1	1	0	0	0	0	0	0	0	Simple pit	nothing	NA	?	NA	NA	NA	NA	NA	2	NA	NA	SE	NA	NA	NA	NA	NA	NA	NA	NA	NA	1	0	0		0	0	0	0	0	0
450	IIIA2-IIIC	IIIm	32.57955121	25.23038837	S	?	0	1_4	1_5	0	1	0	0	0	0	0	0	Simple pit	nothing	Simple pit	?	NA	NA	NA	NA	NA	1	NA	NA	S	NA	NA	NA	NA	NA	NA	NA	NA	NA	1	0	0		0	0	0	0	0	0
745	IIIA1-A2	IIIe	32.57958776	25.23034938	S	?	0	9_10	5_10	0	0	1	0	0	0	0	0	Simple pit	nothing	NA	?	NA	NA	NA	NA	NA	0	NA	NA	S	NA	NA	NA	NA	NA	NA	NA	NA	NA	1	0	0		0	0	0	0	0	0
909	?	NA	32.57939999	25.23049424	N	?	0	2_3	1_5	0	1	0	0	0	0	0	0	Simple pit	?	Simple pit	?	NA	NA	NA	NA	NA	0	NA	right	W	NA	NA	NA	NA	NA	NA	NA	NA	NA	1	0	0		0	0	0	0	0	0
831	?	NA	32.57972398	25.23036882	S	?	0	6 m	0-1	1	0	0	0	0	0	0	0	Simple pit	NA	NA	NA	NA	NA	NA	NA	NA	2	NA	NA	NE	NA	NA	NA	NA	NA	NA	NA	NA	NA	1	0	0		0	0	0	0	0	0
835	IIIA2	IIIe	32.57940425	25.23057142	N	?	0	1_3	1_5	0	1	0	0	0	0	0	0	Simple pit	NA	Simple pit	NA	NA	NA	NA	NA	NA	1	NA	NA	NA	NA	NA	NA	NA	NA	NA	NA	NA	NA	1	0	0		0	0	0	0	0	0
979	IIID/3e dyn	3edyn	32.57939073	25.23071771	N	?	0	newborn	0-1	1	0	0	0	0	0	0	0	Simple pit	NA	NA	?	NA	NA	NA	NA	NA	0	NA	NA	NA	NA	NA	NA	NA	NA	NA	NA	NA	NA	1	0	0		0	0	0	0	0	0
451	?	NA	32.57954803	25.23057428	N	?	0	newborn	0-1	1	0	0	0	0	0	0	0	Simple pit	nothing	NA	?	NA	NA	NA	NA	NA	1	NA	left	N	?	bent	NA	face	face	symmetry head	NA	NA	NA	1	0	0		0	0	0	0	0	0
701	IID-IIIA1	IIt	32.57976558	25.22961059	S	?	0	24 m	1_5	0	1	0	0	0	0	0	0	Simple pit	nothing	Simple pit	?	NA	NA	NA	NA	NA	0	hypercontraction	left	E	W	bent	bent	thorax	left foot	asymmetry leg-thorax	bent	bent	close	1	0	0		0	0	0	0	0	0
945	IIID/3e dyn	3edyn	32.57936049	25.23047533	N	?	1	>19	>19	0	0	0	0	0	1	0	1	Simple pit	nothing	NA	?	NA	NA	NA	NA	NA	4	hypercontraction	back	W	NA	NA	bent	head	face	symmetry head	hyper-bent	hyper-bent	close	1	0	0		0	0	0	0	0	0
774	IIIA1	IIIe	32.5796368	25.23029086	S	?	0	1.5-2	1_5	0	1	0	0	0	0	0	0	Jar	nothing	Jar	?	NA	NA	NA	NA	NA	2	NA	right	N	NA	bent	bent	head	head	symmetry head	bent	bent	joined	2	0	0		0	0	0	0	0	0
960	IIID	IIIt	32.57957742	25.23077603	N	?	0	4	1_5	0	1	0	0	0	0	0	0	Simple pit	covered by a jar	in pit under jar	?	NA	NA	NA	NA	NA	0	NA	right	NA	NA	NA	bent	leg	left knee	symmetry leg	bent	bent	joined	2	0	0		0	0	0	0	0	0
885	3e dyn	3edyn	32.57945269	25.23082997	N	?	0	3	1_5	0	1	0	0	0	0	0	0	Simple pit	covered by a jar	in pit under jar	?	NA	NA	NA	NA	NA	4	NA	left	S	NA	NA	NA	NA	NA	NA	NA	NA	NA	2	0	0		0	0	0	0	0	0
957	IIID/3e dyn	3edyn	32.5794109	25.2308601	N	?	0	6-12 m	0-1	1	0	0	0	0	0	0	0	Jar	nothing	Jar	?	NA	NA	NA	NA	NA	0	NA	belly	NA	NA	NA	NA	NA	NA	NA	NA	NA	NA	2	0	0		0	0	0	0	0	0
948	3e dyn	3edyn	32.57937348	25.23069374	N	?	0	30 m	1_5	0	1	0	0	0	0	0	0	Jar	NA	Jar	?	NA	NA	NA	NA	NA	4	NA	NA	NA	NA	NA	NA	NA	NA	NA	NA	NA	NA	2	0	0		0	0	0	0	0	0
927_B	IIID/3e dyn	3edyn	32.57940109	25.23071394	N	?	0	6 m	0-1	1	0	0	0	0	0	0	0	Simple pit	nothing	NA	?	NA	NA	NA	NA	NA	4	NA	NA	NA	NA	NA	NA	NA	NA	NA	NA	NA	NA	2	0	0		0	0	0	0	0	0
927_A	IIID/3e dyn	3edyn	32.57940109	25.23071394	N	?	0	3_4	1_5	0	1	0	0	0	0	0	0	Simple pit	nothing	Simple pit	?	NA	NA	NA	NA	NA	4	NA	NA	NA	NA	NA	NA	NA	NA	NA	NA	NA	NA	2	0	0		0	0	0	0	0	0
849	IIID/3e dyn	3edyn	32.57946857	25.23068033	N	?	0	newborn-6 m	0-1	1	0	0	0	0	0	0	0	Simple pit	?	NA	?	NA	NA	NA	NA	NA	3	NA	NA	NA	NA	NA	NA	NA	NA	NA	NA	NA	NA	2	0	0		0	0	0	0	0	0
456	IIIA1-A2	IIIe	32.5794246	25.23056122	N	?	0	0_1	0-1	1	0	0	0	0	0	0	0	Coffin	nothing	NA	?	mud	0.55	0.34	?	0.02	0	in situ	left	SE	SW	bent	bent	left leg	head	asymmetry leg-head	bent	bent	separated	3	0	0		0	0	0	0	0	0
162	IIID/3e dyn	3edyn	32.579451	25.23060325	N	?	1	>19	>19	0	0	0	0	0	1	0	1	Coffin	nothing	NA	?	mud	0.395	0.21	?	?	0	NA	NA	E	?	NA	NA	NA	NA	NA	NA	NA	NA	3	0	0		0	0	0	0	0	0
462	IIID/3e dyn	3edyn	32.57951218	25.23070944	N	?	0	1_4	1_5	0	1	0	0	0	0	0	0	Simple pit	nothing	Simple pit	?	NA	NA	NA	NA	NA	1	NA	NA	?	?	NA	NA	NA	NA	NA	NA	NA	NA	NA	0	0		0	0	0	0	0	0
697	IIIA2-IIIC	IIIm	32.57957841	25.23012704	S	?	0	newborn	0-1	1	0	0	0	0	0	0	0	Jar	nothing	Jar	?	NA	NA	NA	NA	NA	1	NA	NA	SE	NA	NA	NA	NA	NA	NA	NA	NA	NA	NA	0	0		0	0	0	0	0	0
889	3e dyn	3edyn	32.57946984	25.23083659	N	?	0	?	?	0	0	0	0	0	0	0	0	Simple pit	NA	NA	NA	NA	NA	NA	NA	NA	4	NA	NA	NA	NA	NA	NA	NA	NA	NA	NA	NA	NA	NA	0	0		0	0	0	0	0	0
865	IIID/3e dyn	3edyn	32.57947661	25.23072765	N	?	0	newborn	0-1	1	0	0	0	0	0	0	0	Simple pit	NA	NA	NA	NA	NA	NA	NA	NA	4	NA	NA	NA	NA	NA	NA	NA	NA	NA	NA	NA	NA	NA	0	0		0	0	0	0	0	0
856	IIID/3e dyn	3edyn	32.57943024	25.23067942	N	?	0	5_10	5_10	0	0	1	0	0	0	0	0	Simple pit	NA	NA	?	NA	NA	NA	NA	NA	1	NA	NA	NA	NA	NA	NA	NA	NA	NA	NA	NA	NA	NA	0	0		0	0	0	0	0	0
879	IIID/3e dyn	3edyn	32.57952663	25.23080483	N	?	0	2-2.5	1_5	0	1	0	0	0	0	0	0	Simple pit	?	Simple pit	?	NA	NA	NA	NA	NA	1	NA	NA	NA	NA	NA	NA	NA	NA	NA	NA	NA	NA	NA	0	0		0	0	0	0	0	0
870	IIID/3e dyn	3edyn	32.57944418	25.23078843	N	?	1	>19	>19	0	0	0	0	0	1	0	1	Simple pit	NA	NA	NA	NA	NA	NA	NA	NA	0	NA	NA	NA	NA	NA	NA	NA	NA	NA	NA	NA	NA	NA	0	0		0	0	0	0	0	0
961	IIID/3e dyn	3edyn	32.57944495	25.23065012	N	?	NA	NA	NA	0	0	0	0	0	0	0	0	Simple pit	NA	NA	NA	NA	NA	NA	NA	NA	0	NA	NA	NA	NA	NA	NA	NA	NA	NA	NA	NA	NA	NA	0	0		0	0	0	0	0	0
866	IIID/3e dyn	3edyn	32.5794963	25.23074913	N	?	0	4_5	1_5	0	1	0	0	0	0	0	0	Simple pit	nothing	Simple pit	?	NA	NA	NA	NA	NA	4	NA	left	N	NA	NA	NA	NA	NA	NA	NA	NA	NA	NA	0	0		0	0	0	0	0	0
445	IIID/3e dyn	3edyn	32.57948131	25.23047749	N	?	0	0_1	0-1	1	0	0	0	0	0	0	0	Simple pit	nothing	NA	?	NA	NA	NA	NA	NA	0	NA	NA	?	NA	NA	NA	NA	NA	NA	NA	NA	NA	NA	0	0		0	0	0	0	0	0
447	IIID/3e dyn	3edyn	32.57945678	25.23054448	N	F	1	>30	>19	0	0	0	0	0	1	0	1	Coffin	wrap in mat	NA	0	mud	0.7	0.45	?	0.025	0	hypercontraction	left	SE	ground	bent	bent	face	face	symmetry head	hyper-bent	hyper-bent	joined	3	0	0		0	0	0	0	0	0
470	IIID/3e dyn	3edyn	32.57954245	25.23073387	N	?	0	1_4	1_5	0	1	0	0	0	0	0	0	Jar	wrap in mat	Jar	?	NA	NA	NA	NA	NA	0	brought in jar	seated	?	W	bent	bent	face	thorax	asymmetry head-thorax	hyper-bent	hyper-bent	joined	3	0	0		0	0	0	0	0	0
924	IIID/3e dyn	3edyn	32.5794125	25.23083971	N	?	0	9	5_10	0	0	1	0	0	0	1	0	Simple pit	covered by frgmt of offerings	NA	?	NA	NA	NA	NA	NA	0	in situ	right	W	S	bent	bent	head	thorax	asymmetry head-thorax	bent	bent	close	2	0	0		0	0	0	0	0	0
409	IIID/3e dyn	3edyn	32.57950853	25.23053266	N	?	0	3_4	1_5	0	1	0	0	0	0	0	0	Simple pit	wrap in mat	Simple pit Wrapped	?	NA	NA	NA	NA	NA	0	hypercontraction	seated	S	NW	hyper-bent	hyper-bent	face	face	symmetry head	hyper-bent	hyper-bent	joined	2	0	0		0	0	0	0	0	0
993	IIID/3e dyn	3edyn	32.57949708	25.23083847	N	?	1	>19	>19	0	0	0	0	0	1	0	1	Simple pit	NA	NA	?	NA	NA	NA	NA	NA	0	NA	NA	NA	NA	NA	NA	NA	NA	NA	NA	NA	NA	2	0	0		0	0	0	0	0	0
653	IIIA2-IIIC	IIIm	32.57948814	25.23013879	S	?	0	12-18 m	1_5	0	1	0	0	0	0	0	0	Jar	wrap in mat	Jar	?	NA	NA	NA	NA	NA	0	hypercontraction	left	SE	ground_NW	bent	bent	knee	knee	symmetry leg	bent	bent	joined	2	0	0		0	0	0	0	0	0
574	IID	IIt	32.57954881	25.22974472	S	?	0	3-6 m	0-1	1	0	0	0	0	0	0	0	Jar	nothing	Jar	?	NA	NA	NA	NA	NA	0	brought in jar	seated	E	W	bent	bent	thorax	left knee	symmetry leg	bent	bent	separated	3	0	0		0	0	0	0	0	0
601	IIIA1-A2	IIIe	32.57961779	25.22973112	S	?	0	12 m	1_5	0	1	0	0	0	0	0	0	Simple pit	nothing	Simple pit	?	NA	NA	NA	NA	NA	0	in situ	left	SE	W	in extension	in extension	knee	knee	symmetry leg	bent	bent	separated	1	0	0		0	0	0	0	0	0
581	IIIA1	IIIe	32.57957444	25.22968044	S	?	0	12-24 m	1_5	0	1	0	0	0	0	0	0	Jar	nothing	Jar	?	NA	NA	NA	NA	NA	0	in situ	left	SE	ground	bent	bent	knee	face	asymmetry leg-head	bent	bent	separated	3	0	0		0	0	0	0	0	0
988	IIID/3e dyn	3edyn	32.57954906	25.23085096	N	?	0	9-12 m	0-1	1	0	0	0	0	0	0	0	Jar	nothing	Jar	?	NA	NA	NA	NA	NA	0	NA	belly	N	ground	slightly bent	bent	thorax	face	asymmetry head-thorax	hyper-bent	hyper-bent	close	2	0	0		0	0	0	0	0	0
852	IIID/3e dyn	3edyn	32.57942158	25.23066741	N	?	0	3	1_5	0	1	0	0	0	0	0	0	Coffin	nothing	Coffin	?	mud	0.65	0.46	0.15	NA	0	in situ	right	SE	N	in extension	bent	right leg	thorax	asymmetry leg-thorax	bent	bent	separated	2	0	0		0	0	0	0	0	0
594	IIIA1-A2	IIIe	32.57961524	25.22977052	S	?	0	newborn-2 m	0-1	1	0	0	0	0	0	0	0	Jar	nothing	Jar	?	NA	NA	NA	NA	NA	0	in situ	back	SE	NE	NA	slightly bent	leg	leg	symmetry leg	NA	NA	NA	2	0	0		0	0	0	0	0	0
399	IIIA2-IIID	IIIm	32.57941456	25.23051495	N	?	0	12-18 m	1_5	0	1	0	0	0	0	0	0	Jar	covered by frgmt of offerings	Jar	?	NA	NA	NA	NA	NA	0	hypercontraction	seated	NW	ground	bent	bent	leg	leg	symmetry leg	hyper-bent	hyper-bent	close	3	0	0		0	0	0	0	0	0
639	IIIA1-A2	IIIe	32.57957197	25.22998017	S	?	0	7_8	5_10	0	0	1	0	0	0	0	0	Simple pit	wrap in mat	NA	?	NA	NA	NA	NA	NA	0	hypercontraction	left	SE	W	bent	bent	face	face	symmetry head	bent	bent	close	1	0	0		0	0	0	0	0	0
997	3e dyn	3edyn	32.57951356	25.23087465	N	F	1	>19	>19	0	0	0	0	0	1	0	1	Simple pit	nothing	NA	?	NA	NA	NA	NA	NA	0	hypercontraction	right	E	ground	bent	bent	left knee	left knee	symmetry leg	hyper-bent	hyper-bent	joined	1	0	0		0	0	0	0	0	0
454	IIID/3e dyn	3edyn	32.57943375	25.2304935	N	F	1	20-29	>19	0	0	0	0	0	1	0	1	Simple pit	basket	NA	?	NA	NA	NA	NA	NA	0	in situ	left	S	SW	hyper-bent	hyper-bent	face	face	symmetry head	bent	bent	separated	1	0	0		0	0	0	0	0	0
589	IIIA1-A2	IIIe	32.57963224	25.2297288	S	?	0	6 m	0-1	1	0	0	0	0	0	0	0	Jar	nothing	Jar	?	NA	NA	NA	NA	NA	0	in situ	back	SE	NW	bent	bent	hip	thorax	asymmetry leg-thorax	bent	bent	joined	3	0	0		0	0	0	0	0	0
975	IID-IIIA2	IIt	32.57953136	25.23023459	S	?	0	12-24 m	1_5	0	1	0	0	0	0	0	0	Jar	nothing	Jar	?	NA	NA	NA	NA	NA	0	in situ	left	SE	NA	in extension	bent	hip	thorax	asymmetry leg-thorax	bent	bent	close	3	1	2	in the jar	0	0	0	0	0	0
475_A	IIID/3e dyn	3edyn	32.57952604	25.23074339	N	?	0	1_4	1_5	0	1	0	0	0	0	0	0	Coffin	nothing	Coffin	?	terracota	0.66	0.34	?	0.025- 0.030	0	in situ	NA	NW	NA	NA	NA	NA	NA	NA	NA	NA	NA	3	1	4	in the chest	0	0	0	0	0	0
475_B	IIID/3e dyn	3edyn	32.57952604	25.23074339	N	?	0	1_4	1_5	0	1	0	0	0	0	0	0	Coffin	nothing	Coffin	?	terracota	0.66	0.34	?	0.025- 0.031	0	in situ	NA	NW	NA	NA	NA	NA	NA	NA	NA	NA	NA	3	1	4	in the trunk	0	0	0	0	0	0
475_C	IIID/3e dyn	3edyn	32.57952604	25.23074339	N	?	0	5_9	5_10	0	0	1	0	0	0	0	0	Coffin	nothing	NA	?	terracota	0.66	0.34	?	0.025- 0.032	0	in situ	NA	NW	NA	NA	NA	NA	NA	NA	NA	NA	NA	3	1	4	in the boot	0	0	0	0	0	0
843	IIID/3e dyn	3edyn	32.57942858	25.23063138	N	?	0	12_15	12_15	0	0	0	1	0	0	0	1	Coffin	wrap in mat	NA	?	mud	0.77	0.5	0.22	0.035	0	hypercontraction	left	SE	NW	bent	bent	left elbow	face	asymmetry head-thorax	hyper-bent	hyper-bent	joined	4	1	1	in the foot box	0	0	0	0	0	0
489	IIID/3e dyn	3edyn	32.57946307	25.2306515	N	?	0	0_1	0-1	1	0	0	0	0	0	0	0	Jar	nothing	Jar	?	NA	NA	NA	NA	NA	0	brought in jar	seated	E	ground	slightly bent	slightly bent	leg	leg	symmetry leg	hyper-bent	hyper-bent	close	2	1	2	in the pot	0	0	0	0	0	0
826	IID	IIt	32.5797751	25.22974462	S	?	0	1	1_5	0	1	0	0	0	0	0	0	Jar	nothing	Jar	?	NA	NA	NA	NA	NA	0	hypercontraction	right	SE	NE	bent	bent	thorax	Abdomen	symmetry thorax	bent	bent	joined	4	1	1	in the pot against the face	1	0	0	0	0	0
963	IIID/3e dyn	3edyn	32.57949207	25.23085651	N	?	0	18 m	1_5	0	1	0	0	0	0	0	0	Jar	nothing	Jar	?	NA	NA	NA	NA	NA	0	in situ	back	NW	SE	bent	bent	thorax	face	asymmetry head-thorax	bent	bent	joined	2	1	1	in filling	0	0	0	0	0	0
655	IIIA2	IIIe	32.5794795	25.22981356	S	?	0	2.5	1_5	0	1	0	0	0	0	0	0	Simple pit	nothing	Simple pit	?	NA	NA	NA	NA	NA	0	in situ	left	SE	W	bent	in extension	face	left leg	asymmetry leg-head	bent	bent	separated	3	1	2	in filling	0	0	0	0	0	0
625	IIIA1	IIIe	32.57980408	25.22971327	S	?	0	18-30 m	1_5	0	1	0	0	0	0	0	0	Simple pit	nothing	Simple pit	?	NA	NA	NA	NA	NA	0	in situ	left	SW	N	bent	bent	face	face	symmetry head	bent	bent	joined	3	1	2	in filling	0	0	0	0	0	0
626	IIIA1	IIIe	32.57984942	25.2297169	S	?	0	12-18 m	1_5	0	1	0	0	0	0	0	0	Jar	wrap in mat	Jar	?	NA	NA	NA	NA	NA	0	in situ	left	SW	ground	bent	bent	right knee	right knee	symmetry leg	bent	bent	separated	4	1	3	1 in filling 1 in jar 1 against jar opening	0	0	0	0	0	1
618	IIIA1	IIIe	32.57941522	25.23001319	S	?	0	18-24 m	1_5	0	1	0	0	0	0	0	0	Simple pit	nothing	Simple pit	?	NA	NA	NA	NA	NA	0	in situ	belly	SE	NE	bent	bent	right knee	thorax	asymmetry leg-thorax	bent	bent	separated	2	1	2	derriere le crane	1	0	0	0	0	0
762	IIIA2	IIIe	32.57963452	25.23016229	S	?	0	3_4	1_5	0	1	0	0	0	0	0	0	Jar	wrap in mat	Jar	?	NA	NA	NA	NA	NA	0	in situ	left	SE	W	bent	bent	face	head	symmetry head	bent	bent	joined	3	1	2	1 in front of face 1 between legs	1	1	0	0	0	0
578	IID-IIIA1	IIt	32.57957947	25.2297064	S	?	0	3_5	1_5	0	1	0	0	0	0	0	0	Simple pit	nothing	Simple pit	?	NA	NA	NA	NA	NA	0	in situ	left	E	W	bent	bent	face	face	symmetry head	bent	bent	joined	2	1	1	in front of the face	1	0	0	0	0	0
592	IID	IIt	32.57966277	25.2297528	S	?	0	2-2.5	1_5	0	1	0	0	0	0	0	0	Simple pit	nothing	Simple pit	?	NA	NA	NA	NA	NA	0	hypercontraction	left	NW	ground_E	bent	bent	face	face	symmetry head	bent	bent	joined	2	1	2	in front of the head	1	0	0	0	0	0
749	IIIA2	IIIe	32.5795794	25.2303111	S	?	0	2.5-3	1_5	0	1	0	0	0	0	0	0	Simple pit	nothing	Simple pit	?	NA	NA	NA	NA	NA	0	in situ	left	SE	ground	bent	bent	face	face	symmetry head	bent	bent	joined	2	1	1	in front of the feet	0	1	0	0	0	0
577	IIIA1-A2	IIIe	32.57952911	25.22975879	S	?	0	6_8	1_5	0	1	0	0	0	0	0	0	Simple pit	nothing	Simple pit	?	NA	NA	NA	NA	NA	0	in situ	left	SE	ground	bent	bent	face	face	symmetry head	bent	bent	joined	2	1	1	1 between head and knees	1	0	0	0	0	0
873	IIID/3e dyn	3edyn	32.5795049	25.23076858	N	F	1	>19	>19	0	0	0	0	0	1	0	1	Coffin	wrap in mat	NA	?	mud	0.65	0.5	0.24	0.04	0	hypercontraction	right	NW	ground	bent	bent	face	thorax	asymmetry head-thorax	hyper-bent	hyper-bent	close	4	1	1	outside chest	0	0	0	0	0	0
535	IIIA2	IIIe	32.57941254	25.23013954	S	?	0	2-2.5	1_5	0	1	0	0	0	0	0	0	Jar	wrap in mat	Jar	?	NA	NA	NA	NA	NA	0	hypercontraction	belly	SE	ground	bent	bent	face	head	symmetry head	bent	bent	close	5	1	1	1 on skull 1 to 20cm above large jar	1	0	0	0	0	0
663	IIIA1	IIIe	32.57952884	25.22973474	S	?	0	12-18 m	1_5	0	1	0	0	0	0	0	0	Simple pit	nothing	Simple pit	?	NA	NA	NA	NA	NA	0	in situ	left	SE	W	bent	bent	chin	chin	symmetry head	bent	bent	separated	2	1	1	on lower limbs	0	1	0	0	0	0
554	IIIA2	IIIe	32.57947658	25.22998629	S	?	0	12_13	12_13	0	0	0	1	0	0	0	1	Simple pit	wrap in mat	NA	?	NA	NA	NA	NA	NA	0	hypercontraction	left	S	ground	bent	bent	face	face	symmetry head	hyper-bent	hyper-bent	joined	3	1	4	2 in front of the legs 2 in front of the head	1	1	0	0	0	0
569	IIIA1-A2	IIIe	32.57954278	25.22982207	S	?	0	12-18 m	1_5	0	1	0	0	0	0	0	0	Simple pit	wrap in mat	Simple pit Wrapped	?	NA	NA	NA	NA	NA	0	NA	left	S	NW	bent	bent	face	face	symmetry head	bent	bent	joined	2	1	1	against pit wall	0	0	0	0	0	0
819	IIIA1-A2	IIIe	32.57971363	25.22980539	S	?	0	6 m	0-1	1	0	0	0	0	0	0	0	Simple pit	wrap in mat	NA	?	NA	NA	NA	NA	NA	0	in situ	left	SE	W	bent	bent	knee	knee	symmetry leg	bent	bent	joined	4	1	2	in front of the face	1	0	0	0	0	0
689	IIIA1	IIIe	32.57973053	25.22955445	S	?	0	24-30 m	1_5	0	1	0	0	0	0	0	0	Jar	wrap in mat	Jar	?	NA	NA	NA	NA	NA	0	in situ	left	SW	SW	bent	bent	right shoulder	pelvis	asymmetry leg-thorax	bent	bent	separated	5	1	3	against jar	0	0	0	0	0	1
557	IIIA2	IIIe	32.57954051	25.22997902	S	?	0	3_4	1_5	0	1	0	0	0	0	0	0	Jar	wrap in mat	Jar	?	NA	NA	NA	NA	NA	0	NA	back	S	sky_NE	bent	bent	pelvis	right foot	symmetry leg	bent	bent	close	3	1	2	1 against the jar 1 against the head	1	0	0	0	0	1
525	IIIA2	IIIe	32.57951965	25.23003301	S	?	0	9-12 m	0-1	1	0	0	0	0	0	0	0	Simple pit	wrap in mat	NA	?	NA	NA	NA	NA	NA	0	in situ	left	S	W	in extension	in extension	thorax	thorax	symmetry thorax	slightly bent	slightly bent	close	2	1	1	in front of the head	1	0	0	0	0	0
608	IIIA1	IIIe	32.57956679	25.22981858	S	?	0	18-30 m	1_5	0	1	0	0	0	0	0	0	Simple pit	wrap in mat	Simple pit Wrapped	?	NA	NA	NA	NA	NA	0	in situ	left	SE	W	bent	bent	face	face	symmetry head	bent	bent	joined	5	1	8	6 in filling 1 in the back 1 on the skull	1	0	0	1	0	0
549	IIIA1	IIIe	32.57954831	25.2298452	S	?	0	1.5-2	1_5	0	1	0	0	0	0	0	0	Simple pit	wrap in mat	Simple pit Wrapped	?	NA	NA	NA	NA	NA	0	in situ	back	S	NW	bent	bent	left leg	leg	symmetry leg	bent	bent	joined	3	1	5	2 in front of the head 1 in front of the feet 1 in front of the knees 1 at the feet	1	1	0	0	0	0
556	IIIA2	IIIe	32.57951937	25.22998903	S	?	0	6_7	5_10	0	0	1	0	0	0	0	0	Simple pit	wrap in mat	NA	?	NA	NA	NA	NA	NA	0	in situ	left	SE	W	bent	bent	face	face	symmetry head	bent	bent	separated	2	1	3	3 in front of the head	1	0	0	0	0	0
616	IIIA2	IIIe	32.57944015	25.22998113	S	?	0	8_9	5_10	0	0	1	0	0	0	0	0	Simple pit	wrap in mat	NA	?	NA	NA	NA	NA	NA	0	NA	left	SE	SE	bent	bent	neck	neck	symmetry head	bent	bent	joined	2	1	2	1 against face 1 against knee	1	1	0	0	0	0
620	IIIA2	IIIe	32.57942178	25.2300588	S	?	0	3_4	1_5	0	1	0	0	0	0	0	0	Simple pit	wrap in mat	Simple pit Wrapped	?	NA	NA	NA	NA	NA	0	hypercontraction	belly	SE	ground	bent	bent	face	face	symmetry head	hyper-bent	hyper-bent	joined	2	1	2	1 in front of the skull 1 in front of the leg	1	1	0	0	0	0
619	IIIA1-A2	IIIe	32.5794225	25.23002889	S	?	0	6-12 m	0-1	1	0	0	0	0	0	0	0	Simple pit	wrap in mat	NA	0	NA	NA	NA	NA	NA	0	NA	left	S	ground_W	bent	bent	face	face	symmetry head	bent	bent	joined	2	1	2	1 in front of the forehead 1 on the back	1	0	0	1	0	0
664	IIIA1	IIIe	32.57954525	25.22971068	S	?	0	3	1_5	0	1	0	0	0	0	0	0	Simple pit	nothing	Simple pit	?	NA	NA	NA	NA	NA	0	in situ	left	SE	W	bent	bent	face	face	symmetry head	bent	bent	separated	3	1	3	at the entrance to the undermining	0	0	0	0	0	0
658	IIIA1	IIIe	32.57950528	25.22980936	S	?	0	9-12 m	0-1	1	0	0	0	0	0	0	0	Jar	nothing	Jar	?	NA	NA	NA	NA	NA	0	in situ	right	SE	sky_E	bent	bent	abdomen	Abdomen	symmetry thorax	bent	bent	separated	4	1	2	at the entrance to the pit	0	0	0	0	0	0
662	IIIA1-A2	IIIe	32.57952378	25.22977426	S	?	0	5	1_5	0	1	0	0	0	0	0	0	Simple pit	nothing	Simple pit	?	NA	NA	NA	NA	NA	0	in situ	left	SE	W	bent	bent	face	face	symmetry head	slightly bent	slightly bent	joined	4	1	3	at the entrance of the sape between mandible and shoulder	1	0	0	0	0	0
537	IIIA1-A2	IIIe	32.57942082	25.23012522	S	?	0	2_3	1_5	0	1	0	0	0	0	0	0	Simple pit	nothing	Simple pit	?	NA	NA	NA	NA	NA	0	in situ	left	SE	W	bent	in extension	face	knee	asymmetry leg-head	bent	bent	close	4	1	2	against edge of pit	0	0	0	0	0	0
583	IIIA1	IIIe	32.57961792	25.22971069	S	?	0	18 m	1_5	0	1	0	0	0	0	0	0	Simple pit	nothing	Simple pit	?	NA	NA	NA	NA	NA	0	in situ	left	SE	ground	bent	in extension	left side	leg	symmetry leg	bent	bent	close	2	1	3	1 against the head 1 cover entry sape	1	0	0	0	0	0
[truncated: 35 more columns]

## Sheet: Cenotaphs
Sepult	chronological period	corrected_chronological_period	estimated_chronological_period_via_position	chronological phase	X	Y	Sector	Aspatharia_unio	Malachite	offerings	type	flooded
165	III (tardif?)	IIID/3e dyn	Indet	Indet	32.57947549	25.23058145	N	NA	NA	NA	cenotaph	0
496	IIIA1-A2	IIIA1-A2	IIIA1-A2	IIIe	32.57949875	25.23016401	S	0	0	jarre remplis de cendres et de charbon	cenotaph	0
622	IIIA1	IIIA1	IIIA1	IIIe	32.57970955	25.22968173	S	1	1	NA	cenotaph	0
676	IIIA1	IIIA1	IIIA1	IIIe	32.57966942	25.229613	S	0	0	Cenotaphe ou depot offrande	cenotaph	0
802	NA	Indet	Indet	NA	32.57965427	25.23042007	S	0	0	NA	cenotaph	0
812	IID	IID	IID	IIt	32.57970612	25.22971351	S	0	0	NA	cenotaph	0
814	IID	IID	IID	IIt	32.5797405	25.22973394	S	0	0	NA	cenotaph	0
965	Indet	Indet	Indet	Indet	32.57956178	25.23071146	N	NA	NA	NA	cenotaph	0
769	Indet	Indet	Indet	Indet	32.57965679	25.23023511	S	NA	NA	NA	cenotaph	0

## Sheet: Archaeological structures
Sepult	chronological period	corrected_chronological_period	estimated_chronological_period_via_position	chronological phase	X	Y	Sector	Type	coffin_material	W_coffin	l_coffin	d_conffin	thickness_coffin	damage	offering	Ornement	Nb_offerings	pallet	Remarque	Inondation
519	(IIIA1)-IIID	IIID	(IIIA1)-IIID	IIIt	32.57954718	25.23076054	N	fosse simple	NA	NA	NA	NA	NA	1	1	0	3	0	Separate vessel offerings	0
643	IIIA2	IIIA2	IIIA2	IIIe	32.57956074	25.23016788	S	fosse simple	NA	NA	NA	NA	NA	0	1	0	3	0	Separate vessel offerings	0
698					32.57973745	25.23017812	S												Separate vessel offerings	0
699					32.57970502	25.23018530	S												Separate vessel offerings	0
805					32.57960935	25.23029638	S												Separate vessel offerings	0
806					32.57963324	25.23032351	S												Separate vessel offerings	0
932					32.57938613	25.23063989	N												Separate vessel offerings	1
844	NA	IIID/3e dyn	IIID/3e dyn	3edyn	32.57942323	25.23063948	N	Coffre	2	0.4	0.25	NA	NA	4	0	0	0		Bottom of pottery coffin	0
640					32.5795784	25.2299892	S												Empty pit	0
641					32.5795887	25.2299914	S												Empty pit	0
820					32.5796893	25.2297937	S	fosse simple						0					Empty pit	0
612	IIIA/B	IIIA/B	IIIA/B	IIIm	32.57976704	25.22954672	S	fosse simple	NA	NA	NA	NA	NA	0	1	0	2	0	Vessel or pottery fragment	0
668					32.579656834	25.229652360	S												Vessel or pottery fragment	0
672					32.579684945	25.229639540	S												Vessel or pottery fragment	0
678					32.57963186	25.22959754	S												Vessel or pottery fragment	0
684	IIC	IIC	IIC	IIt	32.57966747	25.22958045	S	fosse simple	NA	NA	NA	NA	NA	0	1	0	1	0	Vessel or pottery fragment	0
691	NA	Indet	Indet	NA	32.57972168	25.22952839	S	fosse simple	NA	NA	NA	NA	NA	0	1	0	1	0	Vessel or pottery fragment	0
704					32.57972730	25.22967194	S												Vessel or pottery fragment	0
892					32.57945994	25.23085018	N												Vessel or pottery fragment	1
936	NA	Indet	Indet	NA	32.57938667	25.23061549	N	fosse simple	NA	NA	NA	NA	NA	1	1	0	3	2	Vessel or pottery fragment	1
946					32.57937015	25.23055856	N												Vessel or pottery fragment	1
536					32.57946189	25.23010814	S												Dog burial	0
858					32.57941051	25.23069273													Secondary animal burial	0
675	IIIA1	IIIA1	IIIA1	IIIe	32.57969478	25.22962643	S	fosse simple	NA	NA	NA	NA	NA	0	1	0	4	0	Isolated vessel	0
703					32.5797621	25.2296454	S												Isolated vessel	0
